# 1 **Mutational analysis to explore long-range allosteric coupling and decoupling** 2 **in a pentameric channel receptor**

3 Solène N. Lefebvre<sup>1,2</sup>, Antoine Taly<sup>3,4\*</sup>, Anaïs Menny<sup>1,2</sup>, Karima Medjebeur<sup>1</sup>, Pierre-  
4 Jean Corringer<sup>1\*</sup>

5 <sup>1</sup> Unité Récepteurs-Canaux, Institut Pasteur, UMR 3571, CNRS, 75015 Paris,  
6 France

7 <sup>2</sup> Sorbonne Université, Collège doctoral, 75005 Paris, France

8 <sup>3</sup> CNRS, Université de Paris, UPR 9080, Laboratoire de Biochimie Théorique, UPR  
9 13 9080, 13 rue Pierre et Marie Curie, F-75005, Paris, France

10 <sup>4</sup> Institut de Biologie Physico-Chimique-Fondation Edmond de Rothschild, PSL  
11 Research University, Paris, France

12 \*Corresponding authors: antoine.taly@ibpc.fr, pjcorrin@pasteur.fr

## 13 **Abstract**

14 Pentameric ligand-gated ion channels (pLGICs) mediate chemical signaling  
15 through a succession of allosteric transitions that are yet not completely understood.  
16 On the prototypic bacterial channel GLIC, we explored the conformational  
17 landscape of the protein during pH-gating. To this aim, we introduced a series of  
18 allosteric mutations, and characterized the protein conformation over a broad pH  
19 range. We combined electrophysiological recordings, fluorescence quenching  
20 experiments monitoring key quaternary reorganizations, and simulations by normal  
21 mode analysis. Moderate loss-of-function mutations and the allosteric modulator  
22 propofol displace allosteric equilibria involved in pre-activation and pore opening  
23 processes, highlighting long-range allosteric coupling between distant regions of the  
24 protein. In contrast, total loss-of-function mutations stabilize the protein in unique  
25 intermediate conformations where motions are decoupled. Altogether, our data  
26 show that the protein can access a wide conformational landscape, raising the  
27 possibility of multiple conformational pathways during gating.

## 1 Introduction

2 Pentameric ligand gated ion channels (pLGICs) mediate fast synaptic  
3 communication in the brain. In mammals, this family includes the excitatory nicotinic  
4 acetylcholine and serotonin receptors (nAChRs and 5-HT<sub>3</sub>Rs) as well as the  
5 inhibitory  $\gamma$ -aminobutyric acid (GABA) and glycine receptors (GABA<sub>A</sub>Rs and GlyRs)  
6 (Jaiteh et al., 2016). pLGICs are also present in bacteria, notably with the pH-gated  
7 channels GLIC (Bocquet et al., 2007) and sTeLIC (Hu, Nemezc, et al., 2018), the  
8 GABA-gated channel ELIC (Zimmermann and Dutzler, 2011), and the calcium-  
9 modulated DeCLIC (Hu et al., 2020).

10 pLGICs physiological function is mediated by alternating between different  
11 allosteric conformations in response to neurotransmitter binding. Seminal work in  
12 the 80s showed that a minimal four-state model describes the main allosteric  
13 properties of the muscle-type nAChR (Heidmann and Changeux, 1980; Sakmann  
14 et al., 1980). The ability of ACh binding to activate the nAChR involves a resting- to  
15 active-state transition. In addition, prolonged ACh occupancy promotes a biphasic  
16 desensitization process underlying the transition to so-called fast- and slow-  
17 desensitized states. Subsequently, kinetic analysis of the close-to-open transitions  
18 recorded by single channel electrophysiology unraveled multiple additional states  
19 that are required to account for the observed kinetic patterns. For activation, short-  
20 lived intermediate “pre-active” states named “flipped” (Lape et al., 2008) and  
21 “primed” (Mukhtasimova et al., 2009) were included in the kinetic schemes of the  
22 GlyRs and nAChRs, while rate-equilibrium free-energy relationship (REFER)  
23 analysis of numerous mutants of the nAChR suggested passage through four brief  
24 intermediate states (Gupta et al., 2017). Likewise, analysis of single-channel shut  
25 intervals during desensitization are described by the sum of four or five exponential  
26 components, suggesting again additional intermediate states (Elenes and  
27 Auerbach, 2002). Kinetics data thus show that pLGICs undergo a complex cascade  
28 of structural reorganizations in the course of both activation and desensitization.  
29 Those events are at the heart of the protein’s function, allowing the coupling  
30 between the neurotransmitter site and the ion channel gate which are separated by  
31 a distance of 5 nm in pLGIC structures.

32 The past decade has seen great advances by structural biology to seek  
33 understanding about the molecular mechanisms involved in gating (Nemezc et al.,

1 2016). At least one structure of each major member of prokaryotic (Hilf and Dutzler,  
2 2008; Bocquet et al., 2009; Hu, Nemezc, et al., 2018; Hu et al., 2020) and eukaryotic  
3 pLGICs (Althoff et al., 2014; Du et al., 2015; Polovinkin et al., 2018; Gharpure et al.,  
4 2019; Masiulis et al., 2019) have been resolved by X-ray crystallography or cryo-  
5 EM. They highlight a highly conserved 3D architecture within the family. Each  
6 subunit contains a large extracellular domain (ECD) folded in a  $\beta$ -sandwich and a  
7 transmembrane domain (TMD) containing four  $\alpha$ -helices, with the second M2-helix  
8 lining the pore. However, the physiological relevance of structures or their  
9 assignment to particular intermediates or end-states in putative gating pathways  
10 remains ambiguous and poorly studied. Conversely, it is likely that key  
11 conformations, unfavored by crystal packing lattice or under-represented in receptor  
12 populations on cryo-EM grids, are missing in the current structural galleries.

13         Understanding the allosteric transitions underlying gating thus requires  
14 complementary techniques, where the protein conformation can be followed in near-  
15 physiological conditions, i.e. at non-cryogenic temperature on freely moving protein,  
16 and over a broad range of ligand concentrations. To this aim, we previously  
17 developed the Tryptophan/Tyrosine induced quenching technique (TrIQ) (Menny et  
18 al., 2017) on GLIC, a proton-gated channel (Parikh et al., 2011; Laha et al., 2013;  
19 Gonzalez-Gutierrez et al., 2017). In this technique, the protein is labeled with a small  
20 fluorophore, the bimane, and collisional quenching by a neighboring indole  
21 (tryptophans) or phenol (tyrosines) moieties is used to report on changes in distance  
22 between two residues within the protein (Mansoor et al., 2002, 2010; Jones Brunette  
23 and Farrens, 2014). Bimane/quencher pairs on GLIC combined with kinetic analysis  
24 allowed us to characterize pre-activation motions occurring early in the  
25 conformational pathway of activation (Menny et al., 2017). Indeed, they occur at  
26 lower proton concentrations than pore opening, and are complete in less than a  
27 millisecond, much faster than pore opening that occurs in the 30-150 millisecond  
28 range in electrophysiology (Laha et al., 2013).

29         Here, we exploit the TrIQ approach to explore the conformational landscape  
30 of GLIC during pH-gating, in combination with allosteric ligands and mutations. To  
31 help interpreting the fluorescence quenching data into structural terms, we first built  
32 atomistic models of the various bimane-labeled proteins, and simulated their gating  
33 transition pathways using coarse grain modeling and normal mode analysis. We  
34 then performed electrophysiology and fluorescence quenching experiments on a

1 series of GLIC mutants presenting impaired activity. Our results indicate that  
2 mutations alter the function by distinct mechanisms, either displacing the allosteric  
3 equilibriums already present in the wild-type protein, or stabilizing the protein into  
4 novel non-conducting states, suggesting multiple conformational pathways during  
5 gating.

## 6 **Results**

### 7 **Normal Modes Analysis generates two distinct conformational pathways for** 8 **GLIC activation**

9 We first performed atomistic simulations to characterize the protein motions  
10 associated with the transition between resting and active conformations. To do so  
11 we modeled the transition path between GLIC-pH7 (4NPQ) and GLIC-pH4 (4HFI)  
12 X-ray structures using iMODfit (López-Blanco and Chacón, 2013). This program  
13 based on Normal Mode Analysis (NMA) originally designed to perform flexible fitting  
14 of atomic coordinates in cryo-EM densities, has also been successfully used to  
15 investigate concerted motions on NMDA receptors (Esmenjaud et al., 2019). GLIC-  
16 pH7 is in a non-conductive conformation with a closed hydrophobic gate in the upper  
17 part of the pore, consistent with a resting-like state. The GLIC-pH4 structure shows  
18 in contrast an open gate compatible with a conductive conformation (Cheng et al.,  
19 2010; Fritsch et al., 2011; Sauguet et al., 2013; Gonzalez-Gutierrez et al., 2017),  
20 consistent with an active-like structure.

21 Two trajectories, A and B, were computed between the two end state  
22 structures and divided into 12 and 11 frames respectively. RMSD analysis between  
23 each frame and the target structure underlie gradual reorganization of GLIC across  
24 the length of both simulations (Figure 1A). Both trajectories, when visualized from  
25 the resting to active state, show three major components of re-organizations,  
26 namely a quaternary twist of the pentamer, a reorganization of the pore region  
27 leading to its opening/closure, and a quaternary compaction of the ECD.

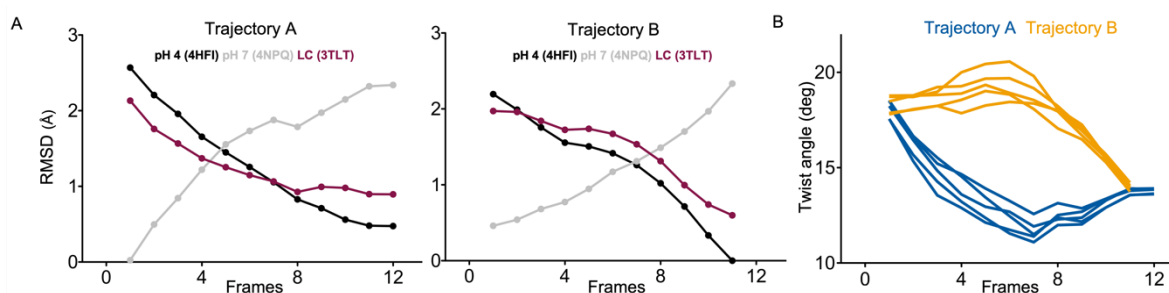

1  
2 **Figure 1. iMODfit generates two distinct trajectories for GLIC activation.** (A) RMSD  
3 evolution throughout the frames of the A and B trajectories against GLIC structures at pH4  
4 (black); pH7 (gray) and locally-closed (LC; purple), pdb codes are indicated. Both trajectories  
5 are shown with frame 1 being the closest to GLIC-pH7. (B) Twist angle measured throughout  
6 the frames on both trajectories. The twist angle is measured by the angle formed between  
7 vectors from the center of mass of the protein and the centers of mass of the ECD and TMD as  
8 defined in (Calimet et al., 2013). Each trace corresponds to the trajectory of a single subunit  
9 within the pentamer.

10 In the A trajectory, the twist motion occurs in the first half of the trajectory  
11 (Figure 1B). This motion describes opposite rotations between ECD and TMD  
12 domains, as measured by the twist angle defined by center of mass vectors of the  
13 ECD and TMD (Taly et al., 2005; Calimet et al., 2013). The reorganization of the  
14 pore happens in the second half of the trajectory and leads to the opening of the  
15 hydrophobic gate, as evaluated by the radius at the level of Ile233 (also named I9';  
16 Figure 2A & 2B). This motion is associated with a tilt of M2 toward M3 (as measured  
17 by a decrease in distance between His235 nitrogen and the carbonyl backbone of  
18 Ile259 that are at H-bond distances in the GLIC-pH4 structure; Figure 2A & 2C), and  
19 with the outward motion of the M2-M3 loop (monitored by an increase in distance  
20 between the C $\alpha$  of residue Pro250 and phenolic oxygen of Tyr197; Figure 2A & 2D).  
21 Pore opening is also associated with, at the bottom of the ECD, a contraction of the  
22  $\beta$ -sandwich (evaluated by a decrease in distance between C $\alpha$  of residues Asp32  
23 and Gly159; Figure 3A & 3C), as well as quaternary reorganization around loop 2  
24 (measured by a decrease in inter-subunit distance C $\beta$  Lys33/Trp160, Figure 3-  
25 Supplement 1). In addition to these two consecutive global motions, the progressive  
26 quaternary compaction of the ECD, another crucial landmark of GLIC  
27 reorganization, occurs throughout the trajectory. This compaction is quantified  
28 through measurement of inter-subunit distances (between C $\beta$  Asp136/Gln101 and  
29 Arg133/Leu103; Figure 3A, 3B & 3-Supplement 2), indicating a progressive

1 decrease in distance throughout the frames. It is noteworthy that these inter-subunit  
 2 distances are highly variable, due to the asymmetric nature of the ECDs of the GLIC-  
 3 pH7 structure, where each subunit  $\beta$ -sandwich presents a unique orientation as well  
 4 as relatively high B-factors (Sauguet et al., 2014). This variability decreases over  
 5 the frames to reach the structure of GLIC-pH4 which is compact and essentially  
 6 symmetric.

7 Trajectory B shows substantially the same components but with an inverted  
 8 sequence of events, pore opening and associated motions start first, followed by  
 9 the twist motion in the last frames, the compaction of the ECD being spread over  
 10 the whole trajectory. In conclusion, iMODfit generate two distinct trajectories that  
 11 are equally plausible to describe a gating transition of activation of GLIC.

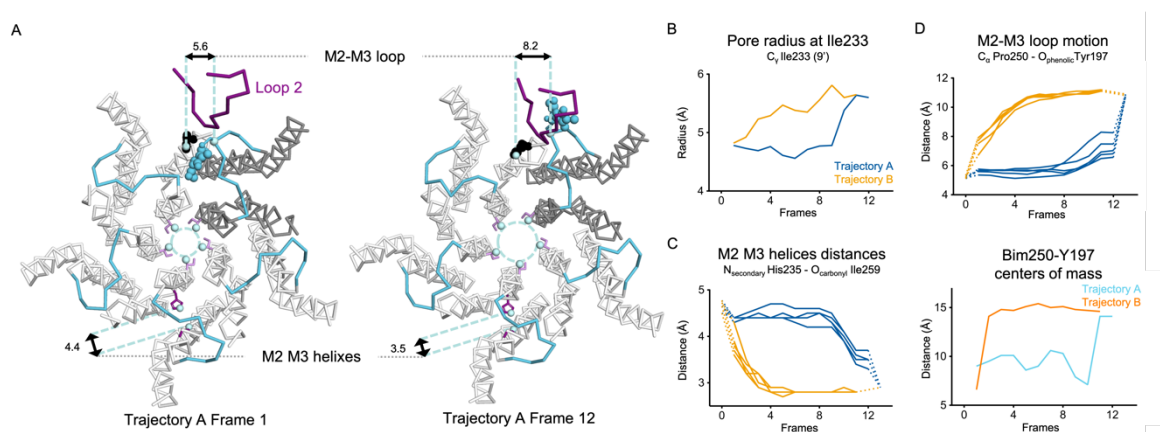

12  
 13 **Figure 2. Key motions of the TMD in A and B trajectories.** (A) Snapshots of GLIC TMD top  
 14 view in the first and last frame of the A trajectory with a Bim250-Y197 quenching pair modeled.  
 15 Bimane is shown in blue and quencher in black spheres. One subunit is shown in grey, the other  
 16 are in white, the M2-M3 loop is shown in blue and the loop 2 from ECD is shown in purple for  
 17 one subunit. Atoms used for measurements are shown in pale blue spheres and distances are  
 18 indicated in angstroms. (B) Pore radius measured at the Ile233 level. (C) Intra-subunit  
 19 separation of M2 and M3 helices measured between atoms indicated. Points at frames 0 and  
 20 13 are the distances measured in pH4 and pH7 X-ray structures. (D) Inter-subunit distances  
 21 showing M2-M3 loop outward motion at the Pro250-Tyr197 level (top panel) and between  
 22 bimane and Tyr197 centroids (bottom panel) in both trajectories A and B.

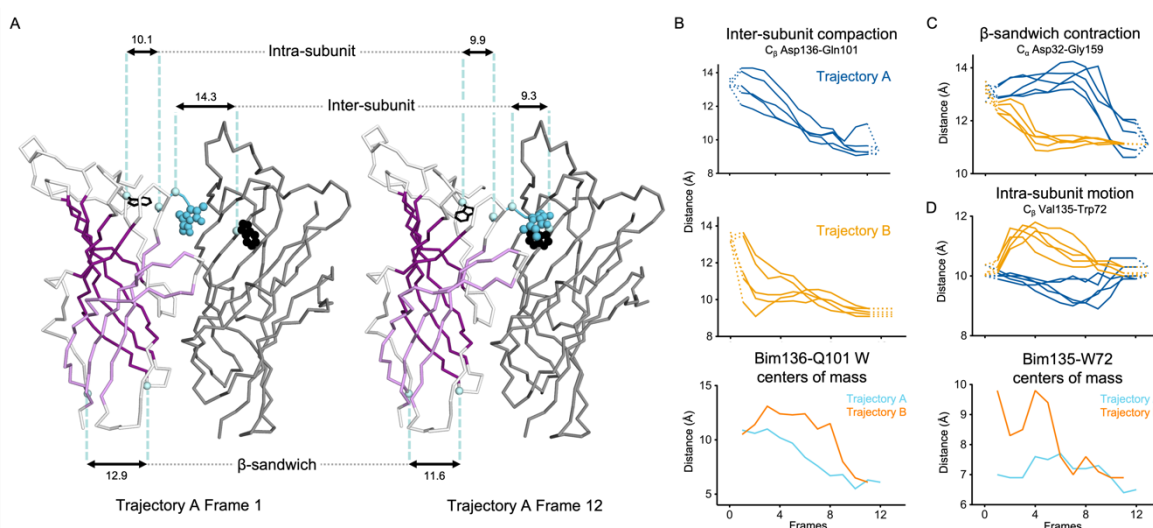

1  
 2 **Figure 3. Key motions of the ECD in A and B trajectories.** (A) Snapshots of two subunits of  
 3 GLIC ECD in the first and last frame of the A trajectory with a Bim136-Q101W quenching pair  
 4 modeled. One subunit is shown in grey, the other in white with sheets of the  $\beta$ -sandwich shown  
 5 in dark and light purple; bimane is shown in blue and quencher in black spheres;  $C_{\alpha}$  and  $C_{\beta}$   
 6 atoms used for measurements are shown in pale blue spheres and distances are indicated in  
 7 angstroms. (B) Inter-subunit distances showing ECD compaction at the Asp136-Gln101 level  
 8 (first two panels) and between bimane and Q101W centroids (bottom panel) in both trajectories  
 9 A and B. Points at frames 0 and 13 are the distances in pH4 and pH7 X-ray structures. (C) Intra-  
 10 subunit distance showing contraction at the bottom of the  $\beta$ -sandwich measured by  $C_{\alpha}$  distances  
 11 between Asp32 and Gly159. (D) Intra-subunit  $C_{\beta}$  distances between Val135 and Trp72 (top  
 12 panel) and between Bim135 and Trp72 centers of mass (bottom panel).

13 **Combined quenching-docking data establish Bim136-Q101W and Bim250-**  
 14 **Y197 as reporter of key allosteric motions of GLIC**

15 To directly relate the conformational reorganizations generated by iMODfit to  
 16 the previously collected fluorescence quenching data (Menny et al., 2017), we  
 17 modeled the various fluorophore/quenching pairs in both trajectories. In the  
 18 fluorescence experiments, a bimane fluorophore was covalently labelled on a  
 19 cysteine at the indicated position (after mutation of the endogenous cysteine C27S),  
 20 and a Trp or Tyr quenching residue was incorporated when necessary. We focused  
 21 our analysis on Bim136-Q101W, Bim135-W72 and Bim250-Y197 (Bim133-L103W  
 22 and Bim33-W160, not used in following fluorescence experiments, are presented in  
 23 Figure 3-Supplementary 1 & 2). For modeling of each pair, the cysteine mutations  
 24 (and quencher when necessary) were performed and the bimane moiety was  
 25 docked into each frame while keeping its carbon at a covalent-bond compatible

1 distance to the sulfur atom of the cysteine. The distance between the centers of  
2 mass of the bimane and indole/phenol moieties in each frame was then measured  
3 to follow the evolution of the distance between the bimane and quencher.

4 For the ECD quenching pair Bim136-Q101W, the simulations show that  
5 Bim136 and the indole ring of Trp101 are separated in the resting-like state, and are  
6 in close contact in the active-like state (Figure 3A). These observations are in good  
7 agreement with the previously published fluorescence data that show a decrease in  
8 fluorescence intensity upon pH drop indicating a decrease in distance between the  
9 bimane and quencher. The A trajectory shows a progressive decrease in distance  
10 that parallels the ECD quaternary compaction movement described previously ( $C_{\beta}$   
11 Asp136/Gln101), whereas the B trajectory shows a more variable pattern, and a  
12 sharper distance decrease only in the last frames (Figure 3B).

13 For the ECD-TMD interface quenching pair Bim250-Y197, our simulations  
14 show that Bim250 is in close contact with the phenol ring of Tyr197 in the resting-  
15 like state, while both moieties are separated in the active-like state, the bimane  
16 moiety moving on the other side of loop 2 (Figure 2A). This is also in agreement with  
17 the fluorescence recordings that showed an increase in fluorescence upon pH-drop  
18 indicating that the Bim250 is moving away from its quencher Tyr197. Both A and B  
19 trajectories show an abrupt change in Bim250/Y197 distances, corresponding  
20 respectively to a late versus early separation, and these changes occur during the  
21 outward motion of the M2-M3 loop ( $P250_{C\alpha}/Y197_O$  distance; Figure 2D).

22 In contrast, for Bim135-W72 (Figure 3D), the distances between the centers  
23 of mass of the bimane and indole moieties are not correlated with the distances  
24 between the residue's backbone, while the pH-dependent changes in fluorescence  
25 show a bell shape curve suggesting important but complex changes in distances at  
26 this level. Since at this position bimane occupies a rather buried location within the  
27 protein structure, we suggest that these discrepancies come from local  
28 reorganization of surrounding residues that are not directly correlated with the  
29 movement of the backbone. Interestingly, we previously solved the X-ray structure  
30 of Bim135-W72 at pH4 by crystallography, which shows a similar location of the  
31 bimane moiety with that of our docking in GLIC-pH4 (Figure 3-Supplementary 3).

32 In conclusion, for Bim136-Q101W and Bim250-Y197 quenching pairs, the  
33 simulations of the end states show good agreement with steady-state fluorescence  
34 data. Interestingly, kinetic analysis show that the conformational motions monitored



1 by both pairs report on a pre-activation transition that occurs well before channel  
2 opening (Figure 4A; Menny et al., 2017). This observation is compatible with  
3 trajectory A, for which the quenching of Bim136-Q101W occurs throughout the  
4 trajectory from frame 1 to 10, the unquenching of Bim250-Y197 occurs between  
5 frame 10 and 11, while the full reorganization of the pore and associated motions  
6 are completed only in the very last frame of the trajectory. The pre-activation  
7 scheme is clearly not compatible with trajectory B, that shows an inverted order of  
8 events.

9 To explore the conformational landscape of GLIC and of its mutants, we thus  
10 monitored in parallel the ECD quaternary compaction with the Bim136-Q101W  
11 fluorescent sensor and reorganizations at the TMD level using electrophysiology or  
12 the fluorescent sensor Bim250-Y197 reporting on M2-M3 loop motions. In specific  
13 cases, we additionally used Bim135-W72 to monitor tertiary motions in the ECD.

#### 14 **The quaternary compaction of the top of the ECD is strongly allosterically** 15 **coupled with the lower part of the ECD interface**

16 To allow an accurate comparison between mutants, we first measured  
17 detailed pH-dependent fluorescence and electrophysiological curves of the three  
18 selected bimane-labelled GLIC (i.e. Bim136-Q101W; Bim250-Y197 and Bim135-  
19 W72, Figure 4B). Fluorescence was measured in steady-state conditions on  
20 detergent (DDM)-purified protein, and normalized to the fluorescence intensity  
21 under denaturing conditions (1% SDS), as previously described (Menny et al.,  
22 2017). GLIC allosteric transitions are indeed particularly robust in different  
23 lipid/detergent conditions (Sauguet et al., 2014; Carswell et al., 2015) and DDM-  
24 purified protein yielded similar results to that of asolectin-reconstituted protein  
25 (Menny et al., 2017), while allowing better reproducibility. For the three pairs, we  
26 confirmed that the pH-dependent fluorescence changes are essentially abolished  
27 when mutating the quenching partner (Figure 4C), phenylalanine not being able to  
28 quench bimane fluorescence (Mansoor et al., 2002). We actually identify here Trp72  
29 as the endogenous quenching residue of Bim135 since the mutant Bim135-W72F  
30 is functional in electrophysiology, but does not undergo pH-dependent quenching  
31 (figure 4C). We also confirm that pH-dependent quenching curves for Bim136-  
32 Q101W and Bim250-Y197 display higher sensitivity (especially for Bim250-Y197)

1 and lower cooperativity than the pH-dependent activation curves recorded by  
 2 electrophysiology (Figure 4C).

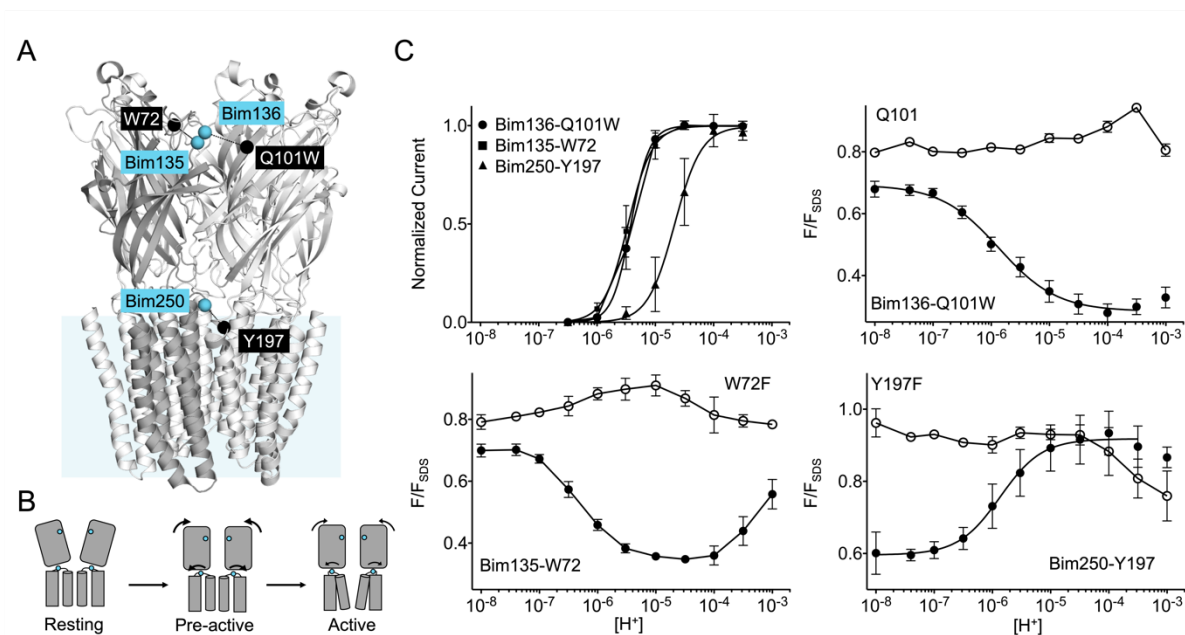

3  
 4 **Figure 4. Quenching pairs used in the study.** (A) GLIC-pH 4 structure side view. Blue spheres  
 5 show the C $\alpha$  of the residues that were submitted to cysteine mutation and bimane labeling  
 6 (Bim135, Bim136 and Bim250), and black spheres C $\alpha$  of the quenchers (W72, Q101W and  
 7 Y197). (B) Pre-activation scheme for GLIC activation, showing a first pre-activation step  
 8 involving full compaction of the ECD and motion of the M2-M3 loop as monitored by  
 9 fluorescence, followed by a pore opening step. (C) pH-dependent response curves of the three  
 10 mutants labelled with bimane by electrophysiology and bimane fluorescence. Fluorescence data  
 11 are shown normalized to the fluorescence of the denatured protein ( $F_{SDS}$ ), bimane fluorescence  
 12 is shown without quencher (empty points) and in presence of the quencher (filled points).

13 We first investigated allosteric mutants located at the inter-subunit interface  
 14 in the lower part of the ECD (Figure 5A). We previously showed that E26Q produces  
 15 a decrease in  $pH_{50}$  for activation (Nemecz et al., 2017), a phenotype which is  
 16 conserved here on the Bim136-Q101W background (Figure 5B and 5C). The  
 17 fluorescence quenching curve of the Bim136-Q101W pair also shows a decrease in  
 18  $pH_{50}$  in presence of the E26Q mutation (Figure 5D), and the  $\Delta pH_{50}$  between WT and  
 19 E26Q are nearly identical in electrophysiology and fluorescence (-0.59 and 0.57  
 20 respectively; Table 1). Interestingly, the fluorescence quenching curve of E26Q has  
 21 a remarkable feature as compared to all other mutants investigated thereafter: in  
 22 the pH7-8 range, where the pH-dependent fluorescence quenching is not yet  
 23 observed, the fluorescence ( $F/F_{SDS}$ ) is significantly lower ( $F_0 = 0.53$ ) as compared

1 to the Bim136-Q101W ( $F_0 = 0.71$ ). This suggests that substantial quenching is  
2 present at neutral pH and E26Q not only alters the allosteric transition, but also  
3 modifies the conformation of the resting state itself which appears to be more  
4 compact when the E26Q mutation is present.

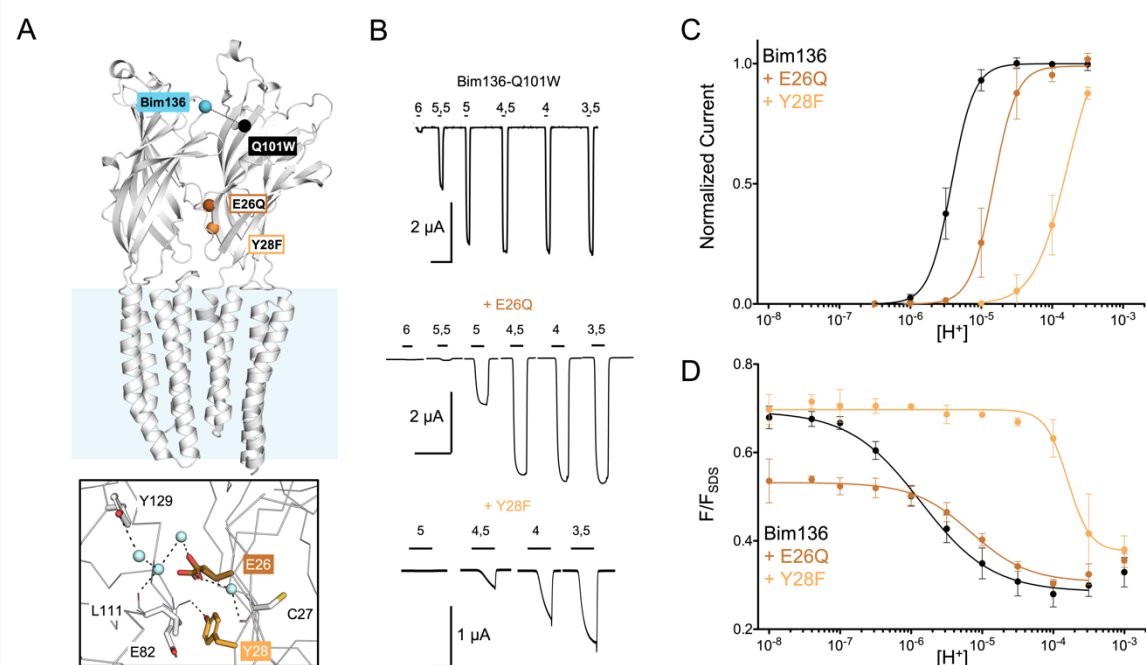

5  
6 **Figure 5. Allosteric coupling within the ECD.** (A) Structure of two monomers of GLIC pH 4  
7 showing positions of the fluorescence sensor (Bim136-Q101W) and the two mutations at the  
8 bottom of the ECD resulting in a partial loss of function. Lower panel shows a zoom on the  
9 interface with Glu26 and Tyr28 residues and their interactions with surrounding residues and  
10 water molecules. (B) Electrophysiological recordings in oocytes of the mutants labelled with  
11 bimeans showing shifted response to higher proton concentration in comparison with GLIC-  
12 Bim136-Q101W. pH applications are shown above each trace and the horizontal scale  
13 represent 1 minute of recording. Graphs represent pH-dependent curves showing a shift to  
14 higher proton concentrations in electrophysiological responses (C) and fluorescence quenching  
15 responses (D) for both mutants.

16 Another mutation, Y28F two residues apart, was reported to produce a  
17 moderate gain of function (Nemecz et al., 2017). Surprisingly, mutating Y28F in the  
18 Bim136-Q101W-C27S background yields a drastic loss of function characterized by  
19 a slow activating receptor and a marked decrease in  $pH_{50}$  (Figure 5B and 5C). We  
20 verified that this loss of function is due to the combination of C27S and Y28F  
21 mutations since, without the endogenous cysteine mutation to serine, Bim136-  
22 Q101W-Y28F electrophysiological response is similar that of Bim136-Q101W

1 (Table 1). In fluorescence, the quenching curve of Bim136-Q101W-Y28F-C27S also  
 2 shows a large decrease in  $pH_{50}$ , associated with an apparent higher cooperativity.  
 3 Again, in this case, the  $\Delta pH_{50}$  are in the same range in fluorescence quenching (-  
 4 2.2) and in electrophysiology (higher than - 1.5, the plateau could not be reached  
 5 with this mutant preventing accurate measurement of the  $pH_{50}$ ).

6 We thus identify here the lower part of the  $\beta$ -sandwich as a region of the  
 7 protein that controls the quaternary structure of the ECD at pH7 and following pH  
 8 decrease. The quaternary compaction of the top of the ECD, monitored with the  
 9 Bim136-Q101W sensor, thus appears strongly coupled in an allosteric manner with  
 10 the lower part of the ECD interface.

| Mutant            | Electrophysiological response<br>bimane labeled |             |    |                  | Fluorescence quenching response<br>in detergent solution |             |             |             |    |                  |
|-------------------|-------------------------------------------------|-------------|----|------------------|----------------------------------------------------------|-------------|-------------|-------------|----|------------------|
|                   | $pH_{50}$                                       | $n_H$       | n  | $\Delta pH_{50}$ | $pH_{50}$                                                | $F_0$       | $F_{max}$   | $n_H$       | n  | $\Delta pH_{50}$ |
| Bim136-Q101W C27S | 5.42 ± 0.08                                     | 2.68 ± 0.33 | 10 | -                | 5.85 ± 0.21                                              | 0.71 ± 0.03 | 0.45 ± 0.06 | 0.77 ± 0.18 | 17 | -                |
| +E26Q             | 4.83 ± 0.12                                     | 2.98 ± 0.64 | 6  | -0.59            | 5.28 ± 0.34                                              | 0.53 ± 0.02 | 0.22 ± 0.02 | 1.13 ± 0.27 | 4  | -0.57            |
| +Y28F             | 3.88 ± 0.08                                     | 2.63 ± 0.68 | 3  | -1.54            | 3.68 ± 0.34                                              | 0.70 ± 0.01 | 0.38 ± 0.09 | < 3         | 3  | -2.17            |
| +Y28F & C27       | 5.34 ± 0.11                                     | 2.03 ± 0.12 | 6  | -0.08            | ND                                                       | ND          | ND          | ND          | -  | -                |
| + D32E            | 4.65 ± 0.12                                     | 2.62 ± 1.51 | 6  | -0.77            | 5.52 ± 0.05                                              | 0.68 ± 0.02 | 0.38 ± 0.01 | 0.75 ± 0.05 | 3  | -0.33            |
| +E222Q            | 4.68 ± 0.09                                     | 2.51 ± 0.33 | 5  | -0.74            | 5.36 ± 0.14                                              | 0.66 ± 0.03 | 0.40 ± 0.04 | 0.74 ± 0.18 | 3  | -0.49            |
| +H235Q            | 4.04 ± 0.21                                     | 1.19 ± 0.31 | 6  | -1.38            | 5.00 ± 0.09                                              | 0.70 ± 0.01 | 0.42 ± 0.01 | 0.78 ± 0.10 | 3  | -0.85            |
| +Propofol         | 5.16 ± 0.13                                     | = 2.5       | 3  | -0.26            | 5.33 ± 0.06                                              | 0.67 ± 0.02 | 0.38 ± 0.01 | 1.21 ± 0.21 | 4  | -0.52            |
| +H235Q & propofol | 4.71 ± 0.15                                     | 1.53 ± 0.48 | 6  | -0.71            | 5.67 ± 0.14                                              | 0.70 ± 0.01 | 0.43 ± 0.01 | 1.25 ± 0.04 | 3  | -0.18            |
| +H235F            | NF                                              | NF          | 3  | -                | 5.25 ± 0.08                                              | 0.70 ± 0.05 | 0.38 ± 0.04 | 1.06 ± 0.17 | 3  | -0.60            |
| +L157A            | NF                                              | NF          | 3  | -                | 5.42 ± 0.65                                              | 0.67 ± 0.01 | 0.19 ± 0.09 | 0.71 ± 0.46 | 4  | -0.43            |
| +L246A            | NF                                              | NF          | 3  | -                | 4.87 ± 0.14                                              | 0.65 ± 0.01 | 0.24 ± 0.01 | 0.79 ± 0.12 | 3  | -0.98            |
| Bim250-Y197       | 4.66 ± 0.18                                     | 2.20 ± 0.54 | 12 | -                | 5.83 ± 0.17                                              | 0.59 ± 0.04 | 0.33 ± 0.09 | 1.19 ± 0.28 | 8  | -                |
| +H235F            | NF                                              | NF          | 3  | -                | 5.40 ± 0.13                                              | 0.54 ± 0.01 | 0.20 ± 0.01 | 1.16 ± 0.15 | 4  | -0.43            |
| +L157A            | NF                                              | NF          | 3  | -                | 5.81 ± 0.19                                              | 0.49 ± 0.06 | 0.45 ± 0.07 | 0.64 ± 0.19 | 3  | -0.02            |
| +L246A            | NF                                              | NF          | 3  | -                | 5.53 ± 0.03                                              | 0.64 ± 0.01 | 0.30 ± 0.01 | 1.69 ± 0.29 | 3  | -0.3             |

11  
 12 **Table 1. Dose-dependence of electrophysiological and fluorescence quenching**  
 13 **responses.**  $pH_{50}$  and Hill coefficient  $n_H$  average and standard deviation values are shown after  
 14 individual fitting of all measurements. Number of experiments n correspond to the number of  
 15 oocytes for electrophysiology and the number of fluorescence measurements, each  
 16 measurement including values for a full pH range.  $F_0$  corresponds to the initial fluorescence  
 17 value at pH 7/8 and  $F_{max}$  the maximum variation in fluorescence amplitude within the pH range.  
 18  $\Delta pH_{50}$  values are calculated in comparison with mutants and their parent construct Bim136-  
 19 Q101W or Bim250-Y197. NF stands for non-functional and ND for not determined. Hill  
 20 coefficients have been constrained to 2.5 or below 3 in order to reasonably fit Bim136 + Propofol  
 21 current and Bim136 + Y28F fluorescence respectively.

## 1 Long-range allosteric coupling between the TMD and the top of the ECD

2 To investigate whether allosteric coupling occurs with more distant regions of  
3 the protein, we selected three loss of function mutations further away from the  
4 Bim136-Q101W pair: D32E nearby the ECD-TMD interface ; H235Q in the middle  
5 of the TMD and E222Q, at the bottom of the TMD lining the pore (Figure 6A)  
6 (Sauguet et al., 2014) (Nemecz et al., 2017).

7 Performing these mutations on the Bim136-Q101W-C27S background  
8 shows overall a conservation of their phenotype, with a 10-fold (D32E and E222Q)  
9 and more than 30-fold (H235Q) decrease in the  $pH_{50}$  of activation as compared to  
10 Bim136-Q101W-C27S (Figure 6B and 6C). The fluorescence quenching curves are  
11 also shifted to lower  $pH_{50}$ S, with  $\Delta pH_{50}$ S of 3-fold (D32E and E222Q) and 10-fold  
12 (H235Q) (Figure 6D).

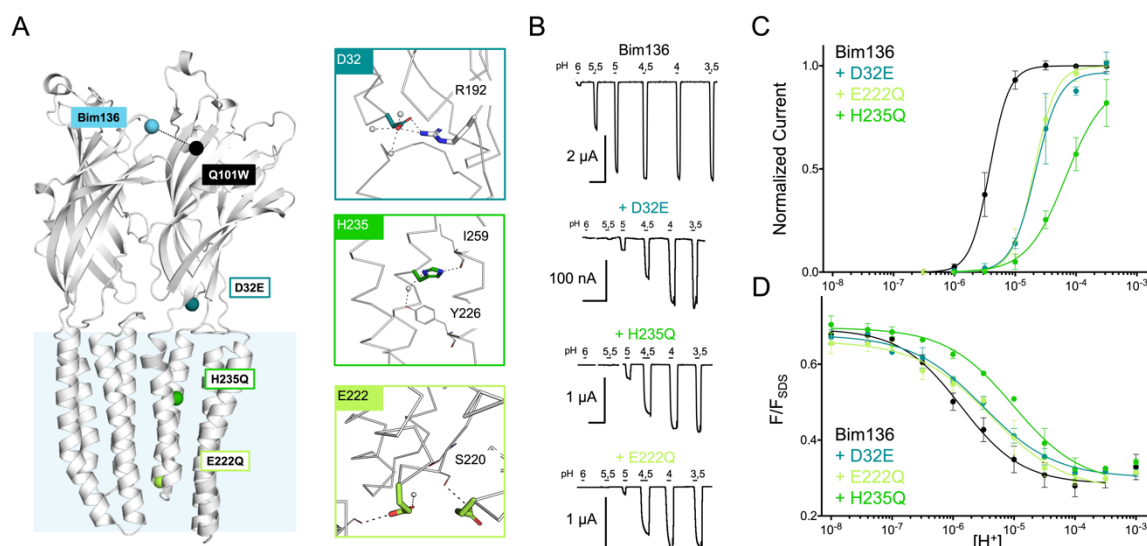

13  
14 **Figure 6. Allosteric coupling between the top of the ECD and around the TMD.** (A)  
15 Structure of two monomers of GLIC pH 4 showing positions of the fluorescence sensor (Bim136-  
16 Q101W) at the top of the ECD and three mutations distributed along the protein. Right panels  
17 show zooms on important interactions with the mutated residues. (B) Electrophysiological  
18 recordings of the 3 mutants in oocytes, labelled with bimane. Recording of GLIC Bim136-  
19 Q101W is shown for comparison. pH applications are shown above each trace and the  
20 horizontal scale represent 1 minute of recording. pH-dependent curves for electrophysiological  
21 response (C) and fluorescence quenching (D) for the three mutants in comparison with Bim136-  
22 Q101W showing a shift to higher proton concentration of the response for all three mutants.

23 The quenching data thus reveal an allosteric coupling between both ends of  
24 the protein, since the structural perturbations performed around the TMD are

1 transmitted to the top of the ECD, impairing its compaction. However, as opposed  
2 to the ECD mutations E26Q and Y28F/C27S, these mutations have a stronger effect  
3 on the  $pH_{50}$  of the electrophysiological response as compared to fluorescence  
4 quenching. It thus suggests that both processes are not fully coupled for mutations  
5 further away from the sensor site.

## 6 **Total loss of function mutations decouple ECD and TMD allosteric motions**

7 To further explore the conformational landscape accessible to GLIC, we  
8 extended the analysis to mutations known to totally prohibit channel opening (Figure  
9 7A). We selected three mutants: H235F, L157A and L246A which show robust  
10 surface expression and very little to no current in oocytes (Figure 7B & 7-  
11 Supplementary 1). As electrophysiology could not be used to follow pore opening,  
12 we monitored the motion of the M2-M3 loop with Bim250-Y197, in addition to the  
13 ECD quaternary and tertiary sensors Bim136-Q10W and Bim135-W72 (Figure 7C).

14 Mutants L157A and L246A reveal unique quenching phenotypes. Combined  
15 with Bim136-Q101W, they both show a pH-dependent quenching of fluorescence  
16 with a greatly decreased amplitude associated with a significant decrease in  $pH_{50}$   
17 as compared to the Bim136-Q101W background. When combined with Bim135-  
18 W72, L157A shows a decrease in  $pH_{50}$  of the first quenching component, and a  
19 diminished amplitude of the second unquenching component. In contrast, neither  
20 L157A nor L246A significantly alter the movement at Bim250, which occurs with a  
21 complete amplitude and no change in  $pH_{50}$ . Thus, unlike the moderate loss of  
22 function mutants investigated above, these mutations decouple the protein motions,  
23 partially impairing quaternary compaction of the ECD but allowing full motion of the  
24 M2-M3 loop.

25 The mutation H235F leads to a phenotype opposite to that of L157A or  
26 L246A. It allows for a full compaction of the ECD, since its Bim136-Q101W pH-  
27 dependent curve shows a full quenching amplitude and a decrease in  $pH_{50}$ .  
28 Combined with Bim135-W72, H235F displays a phenotype with a notably much  
29 smaller amplitude of the first component. In contrast, it impairs the movement of the  
30 M2-M3 loop, with only a partial pH-dependent dequenching at Bim250. H235F thus  
31 seems to decouple the protein motion by partially impairing the M2-M3 motion, but  
32 allowing full movement of the ECD.

1           Altogether, mutants H235F, L157A and L246A lead to quenching phenotypes  
 2           that do not match any X-ray structures of GLIC WT, suggesting these mutants of  
 3           GLIC visit new global conformations.

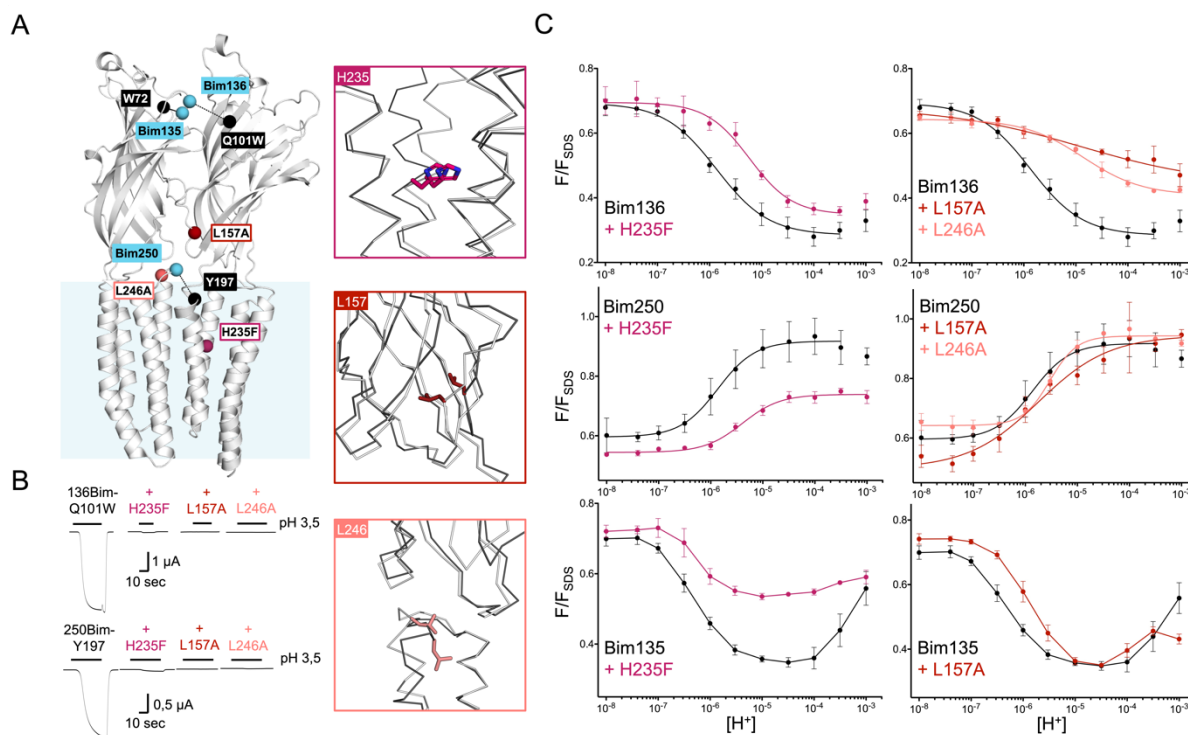

4  
 5           **Figure 7. non-functional mutants decouple ECD and TMD motions.** (A) Structure of two  
 6           monomers of GLIC pH 4 showing the position of the fluorescence sensors (Bim136-Q101W,  
 7           Bim135-W72 and Bim250-Y197) and three mutations causing a total loss of function. Right  
 8           panels show zooms on important reorganisations of the mutated residues between structures  
 9           at pH 4 (grey) and pH7 (black). (B) Electrophysiological recordings in oocytes of the 3 mutants  
 10           labelled with bimane showing no current in comparison with GLIC presenting sensor mutations  
 11           only. (C) pH-dependent curves in fluorescence for the three mutants with the sensor Bim136-  
 12           Q101W, Bim250-Y197 and Bim135-W72.

13           **Allosteric modulator propofol displaces allosteric equilibriums of activation.**

14           We also used the TrIQ technique to dissect the mechanism of action of the  
 15           general anesthetic propofol, an allosteric modulator of GLIC. Propofol binds at three  
 16           main sites within the TMD: one site in the pore itself nearby the middle of the TMD,  
 17           and two sites in the upper part of the TMD at intra- or inter-subunit locations (Figure  
 18           8A). Propofol is an inhibitor of GLIC, but it has been shown to be a potentiator of the  
 19           H235Q mutant (Fourati et al., 2018). We verified that these effects are conserved in  
 20           the Bim136-Q101W-C27S background, with propofol decreasing the pH<sub>50</sub> of

1 activation of Bim136-Q101W while increasing the  $pH_{50}$  of Bim136-Q101W-H235Q  
 2 (Figure 8B and C). Interestingly, on both mutants, fluorescence quenching  
 3 experiments essentially parallel the electrophysiological data. Addition of 100  $\mu$ M  
 4 propofol on Bim136-Q101W decreases the fluorescence  $pH_{50}$  by half a unit, while it  
 5 increases that of Bim136-Q101W-H235Q by more than half a unit (Figure 8D). Data  
 6 thus show that propofol do not act locally by altering the conformation of the TMD,  
 7 but rather acts on the global allosteric transitions by displacing the equilibrium  
 8 between resting and active conformation and preserving coupling between ECD and  
 9 TMD.

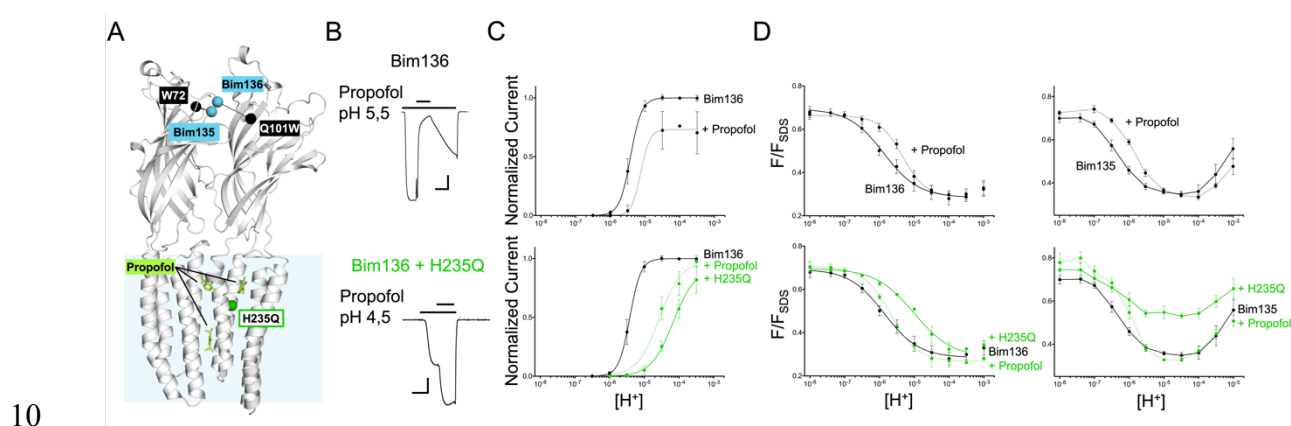

10  
 11 **Figure 8. Effect of propofol on ECD compaction.** (A) Structure of two monomers of GLIC pH  
 12 4 showing positions of the fluorescence sensor Bim136-Q101W at the top of the ECD and three  
 13 propofol binding sites intra, inter-subunit and in the pore identified by X-ray crystallography.  
 14 Example of electrophysiological response to 100  $\mu$ M propofol during a low pH application (B)  
 15 and dose response curves (C) in Bim136-Q101W with and without the H235Q mutation showing  
 16 inhibition and potentiation respectively (scale bars represent 100 nA and 30 sec). (D) Effect of  
 17 100  $\mu$ M propofol on fluorescence quenching without (top panels) and with H235Q mutation  
 18 (lower panels) for the Bim136-Q101W and Bim135-W72 sensors.

19 We also investigated propofol in the Bim135-W72 H235Q mutant.  
 20 Interestingly this mutant shows a similar quenching curve to the one of Bim135-W72  
 21 H235F, with the difference that electrophysiological response can be measured with  
 22 mutation in Gln while it is not functional in Phe. The fluorescence recordings show  
 23 that propofol elicits a decrease in  $pH_{50}$  for the first quenching component of Bim135-  
 24 W72. For Bim135-W72-H235Q, the quenching curve displays a much lower  
 25 amplitude as compared to the WT, while propofol restores a WT-like pH-dependent  
 26 quenching curve. The observed global lower amplitude in Bim135-72 H235Q/F  
 27 mutant may either result from a decrease in the reorganization responsible for the



1 amplitude of first component, or a rightward shift of the curve resulting in an overlap  
2 and therefore averaging of the bimane quenching and unquenching curves.  
3 Therefore, the fluorescence data related to the Bim135-W72 pair cannot be  
4 interpreted in structural terms, however they further document the strong allosteric  
5 coupling with the upper part of the ECD.

## 6 **Discussion**

### 7 **Long-range allosteric coupling associated with pre-activation and pore-** 8 **opening processes.**

9 In this study, the fluorescence quenching and electrophysiological data are  
10 recorded on an ensemble of GLIC proteins, on which pH-dependent changes lead  
11 to a cascade of allosteric reorganizations from the resting to the active and  
12 potentially desensitized conformations.

13 We found that a series of five loss-of-function mutations, which shift the pH-  
14 dependent electrophysiological curves to higher concentrations, also shift the pH-  
15 dependent fluorescence quenching curve of ECD-compaction at the extracellular  
16 top of the protein. The ECD-compaction is thus sensitive to mutations scattered  
17 along the protein structure down to the opposite cytoplasmic end, indicating  
18 substantial allosteric coupling.

19 Our previous kinetic analysis showed that the conformational motions  
20 followed by fluorescence occur early in the pathway of activation (Figure 4A).  
21 Following a rapid pH-drop using a stopped-flow device, these “pre-activation”  
22 motions are complete in less than a millisecond, much faster than pore opening that  
23 occurs in the 30-150 millisecond range in electrophysiology (Laha et al., 2013).  
24 Since pre-activation precedes pore-opening, it is likely that a shift in pre-activation  
25 (followed here by fluorescence) will be reflected as a parallel shift in activation  
26 (followed by electrophysiology). ECD mutations E26Q and Y28F/C27S present such  
27 a phenotype of paralleled variations in electrophysiology and fluorescence  
28 quenching  $pH_{50}$  which indicates that those mutations mainly impact the pre-  
29 activation transition. In contrast, ECD-TMD interface and TMD mutations D32E,  
30 E222Q and H235Q lead to a stronger  $pH_{50}$  shift in electrophysiology than in  
31 fluorescence quenching. This phenotype suggests that these mutations alter not

1 only the pre-activation, but also the downstream pore-opening transitions leading to  
2 an additive effect on the function.

3 In the same line, the quenching data related to the allosteric modulation of  
4 propofol suggest its major effect on the pre-activation transition. The emerging  
5 picture is thus that pre-activation, that is associated with complete motions at the  
6 various quenching pairs, involves a global reorganization of the protein. The low  
7 cooperativity of the fluorescence curves potentially suggests that more than one  
8 state might be involved in this process. In contrast, the downstream pore-opening  
9 process would involve a more local reorganization that would be restricted to the  
10 TMD (E222Q, H235Q, pore opening) and the lower part of the ECD (D32E). We  
11 speculate that the slowness of this process may arise from the wetting of the pore,  
12 particularly its upper region, which is highly hydrophobic and for which hydration  
13 should be energetically costly.

14 To investigate the structural dynamics of the protein, we generated two *in*  
15 *silico* conformational trajectories between the resting-like and active-like X-ray  
16 structures of GLIC. Both trajectories show significant coupling between the opening  
17 of the gate in the pore, the motion of the M2-M3 loop, and the contraction of the  
18 lower part of the  $\beta$ -sandwich. These structural couplings were already highlighted in  
19 a recent all-atom molecular dynamic simulation with a swarm-based string method  
20 to solve for the minimum free-energy gating pathways of GLIC activation (Lev et al.,  
21 2017). Remarkably, the two trajectories show an inverse sequence of events with a  
22 gate opening in the last vs first frames of the transition for trajectories A and B  
23 respectively. The pre-activation model described above involves a late gate opening  
24 and overall fits trajectory A.

## 25 **Conformational flexibility of GLIC during the pre-activation transition.**

26 An important finding of this work is that the quenching pattern of the total loss  
27 of function mutations revealed novel non-conductive conformations, where the  
28 movement of the ECD and TMD are partially or fully decoupled. In GLIC WT, His235  
29 interacts with M3 through a hydrogen bond in the open state (Rienzo et al., 2014).  
30 Unlike a mutation to glutamine, mutation of His235 to phenylalanine prevents this  
31 critical interaction leading to a non-functional receptor (Prevost et al., 2012). We  
32 show here that following a pH decrease H235F undergoes a complete “quenching  
33 motion” of the ECD, but only a partial “unquenching motion” of the M2-M3 loop. The

1 mutation thus seems to block the protein in an intermediate state in the A trajectory,  
2 where the pH-elicited motions of the ECD are complete but not transmitted to the  
3 TMD (Figure 9). Interestingly, the structure of the H235F mutant was previously  
4 solved by crystallography at pH 4 in a “locally closed” (LC, 3TLT) conformation  
5 (Prevost et al., 2012). This conformation is characterized by a fully active-like  
6 structure of the ECD, but a resting-like structure of the TMD including the M2-M3  
7 loop and a closed channel. This structure fits well with the quenching data of H235F  
8 at Bim136-Q101W, but not with that of Bim250-Y197 where the fluorescence  
9 quenching data indicate a partial movement of M2-M3 that is not seen in the X-ray  
10 structure. Inspection of the structure of H235F shows however a movement of the  
11 quencher Y197 which side chain is re-oriented toward the transmembrane domain,  
12 away from Bim250, a feature that could plausibly account for this partial  
13 unquenching.

14 Leu157 and Leu246, located around the ECD-TMD interface, are involved in  
15 strong hydrophobic interactions in the active state, Leu157 stabilizes a compact  
16 conformation of the  $\beta$ -sandwich, and Leu246 a key ECD-TMD interaction (Sauguet  
17 et al., 2014). Mutations L157A and L246A display an inverse phenotype as  
18 compared to H235F, since they allow a complete “unquenching” motion of the M2-  
19 M3 loop but a partial compaction of the ECD. These mutations thus seem to block  
20 the protein in an intermediate state within the trajectory B, and this time, with the  
21 complete pH-elicited motions of the M2-M3 loop, but not completely transmitted to  
22 the top of the ECD nor the channel gate. Altogether, these mutations reveal key  
23 regions that act as hinges within the signal transduction pathways of GLIC (Mowrey  
24 et al., 2013).

25 It is noteworthy that the mechanism whereby protons activate GLIC remains  
26 elusive. In particular, systematic mutational analysis of every residues that change  
27 protonation state in the pH4-6 range (Asp, Glu and His) indicate that protons act on  
28 several sites to activate GLIC, with a particularly strong effect of mutations nearby  
29 the ECD-TMD interface (Nemecz et al., 2017; Hu, Ataka, et al., 2018). With the three  
30 mutations H235F, L157A and L246A, we show here that pH change elicits motions  
31 independently at two levels, the ECD compaction (in H235F) and the M2-M3 loop  
32 movement (in L157A and L246A), further supporting such a multi-sites effect.

33 Another important conclusion from our data is that the protein has access to  
34 an unanticipated repertoire of conformations, and NMA analysis suggests that these

1 conformations might contribute to different allosteric pathways of pre-activation. The  
2 idea that GLIC can follow different trajectories during the gating process was already  
3 proposed. For instance, through the use of a hybrid elastic-network Brownian  
4 dynamics simulation predicting two possible pathways for GLIC gating, that are  
5 characterized by different compactions of the ECD (Orellana et al., 2016). Here, we  
6 extend this concept by proposing two pathways involving either an early motion of  
7 the ECD or an early motion of the M2-M3 loop (Figure 9).

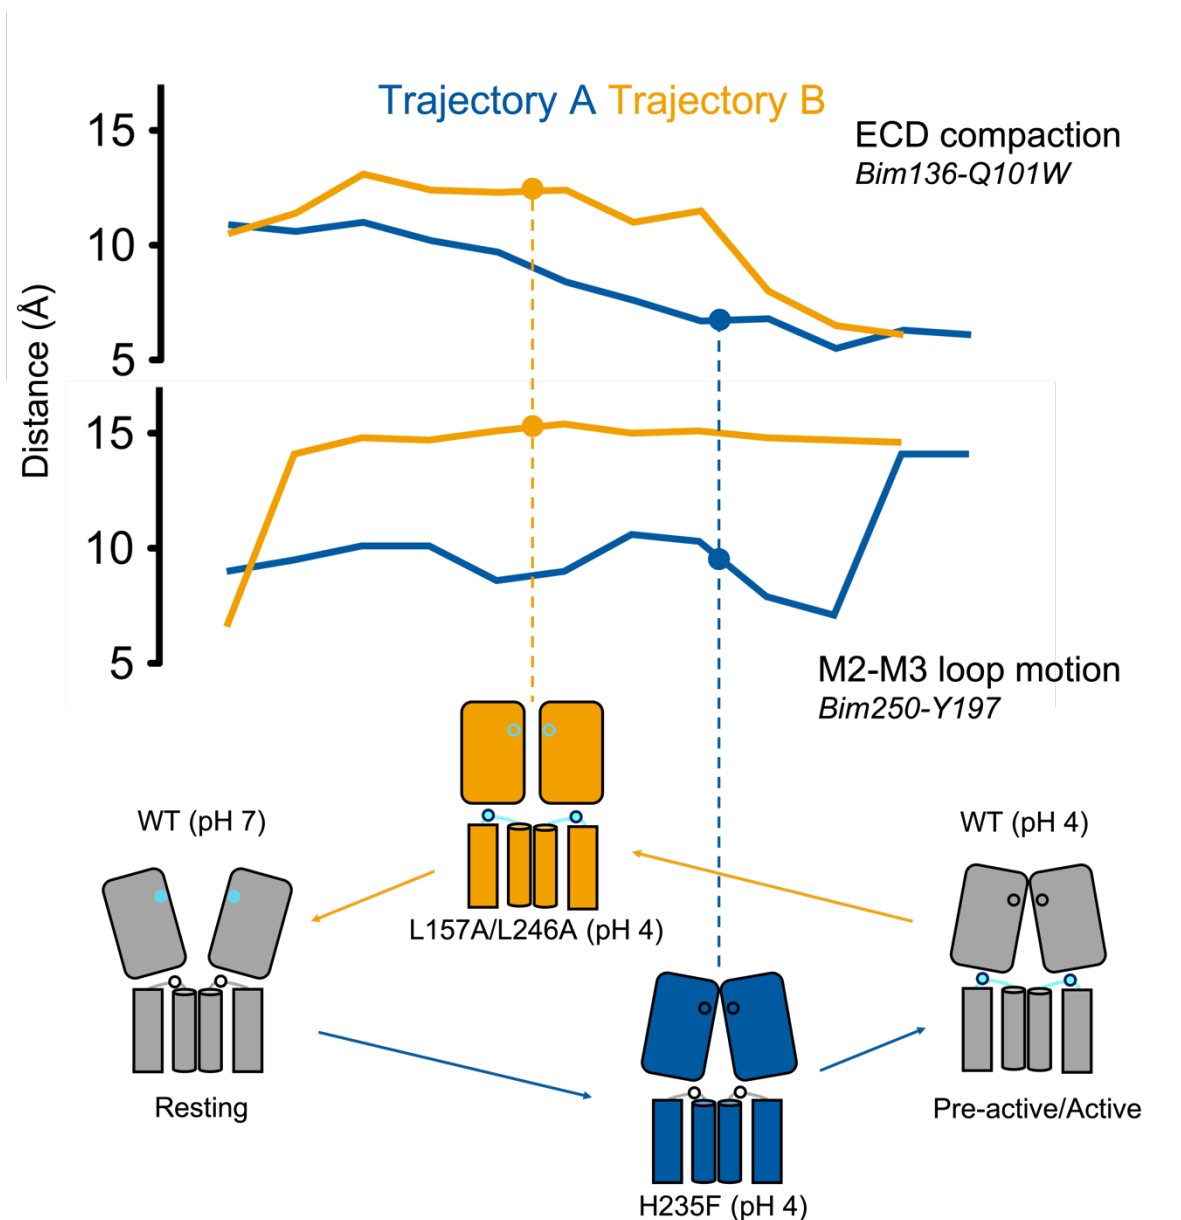

8  
9 **Figure 9. Speculative summary scheme.** Bimane-quencher centroid distances are shown for  
10 the trajectories A and B. Non-functional mutants H235F and L157A/L246A are tentatively placed  
11 on the trajectories A and B respectively, according to their quenching pattern.

## 1 **Consequences on the gating mechanism within the pLGIC family**

2           The conservation of the gating mechanism between bacterial and eukaryotic  
3 pLGICs is well documented by the available structures with the common allosteric  
4 regulatory sites for ligands and mutations (Sauguet et al., 2015; Bertozzi et al., 2016;  
5 Rienzo et al., 2016), together with the allosteric compatibility between eukaryotic  
6 and prokaryotic ECD/TMD domains to form functional chimeras (Duret et al., 2011;  
7 Moraga-Cid et al., 2015; Laverty et al., 2017). It is therefore tempting to speculate  
8 that the pre-activation transition of GLIC that we characterize here might have  
9 counterparts in human neurotransmitter-gated receptors. In this line, some recent  
10 structures of eukaryotic receptors including the 5-HT<sub>3</sub>R (Polovinkin et al., 2018) and  
11 the GABA<sub>A</sub>R (Masiulis et al., 2019) show pre-active-like conformations  
12 characterized by marked agonist-elicited reorganization of the ECD but a closed  
13 channel at the TMD. Additionally, the flipped state, where the conformational change  
14 of the orthosteric site is predicted to be rather complete, but where the channel is  
15 closed, would fit the functional requirement of a pre-active state (Lape et al., 2008).  
16 Our observation that propofol specifically affects the pre-activation step might thus  
17 tentatively be extended to eukaryotic receptors.

18           An unexpected finding here is that GLIC and its mutants have access to a  
19 large repertoire of conformational states. It raises the possibility that GLIC can follow  
20 several conformational trajectories during the gating transitions. This idea  
21 challenges the conventional concept that receptor activation involves a single  
22 conformational pathway. For instance, REFER analysis of the muscle-type nAChR  
23 show that two discrete regions undergo an early motion during activation, the  
24 orthosteric site and the M2-M3 loop. These data were interpreted in the framework  
25 of a four-state linear transition pathway (Gupta et al., 2017), but alternatively, it is  
26 plausible that the protein can follow two pathways, one starting at the orthosteric  
27 site and the other at the M2-M3 loop.

28           Our work also investigates the mechanism of action of allosteric mutations  
29 by measuring their effects at different levels of the protein. The loss of function  
30 mutations that shift the pH-dependent activation curves produce parallel shifts in the  
31 fluorescence quenching, indicating that they alter the equilibrium constant “L”  
32 between the allosteric states involved in activation, driving them toward the resting  
33 state (Galzi et al., 1996). In sharp contrast, the total loss-of-function mutants, silent

1 in electrophysiological recordings, were found to undergo proton-elicited allosteric  
2 transitions by fluorescence quenching, visiting other conformations that plausibly  
3 correspond to intermediates blocked within the activation pathway. Actually,  
4 allosteric mutations of neurotransmitter-gated receptors, causing congenital  
5 pathologies including myasthenia and hyperekplexia have been extensively studied  
6 (Taly and Changeux, 2008; Bode and Lynch, 2014; Hernandez and Macdonald,  
7 2019). Most of the hot spots mutated here on GLIC were found associated with  
8 pathologies on human receptors. In particular, the lower part of the ECD-ECD  
9 interface is the site of a *de novo* S76R mutation in GABA<sub>A</sub>  $\alpha$ 1 (homologous to Glu26)  
10 causing epilepsy (Johannesen et al., 2016) and the mutation L42P in the nAChR  $\delta$   
11 (homologous to Cys27) causing myasthenia (Shen et al., 2008). This latter mutation  
12 (as well as mutation of Asn41, homologous to Glu26) decreases activation kinetics  
13 and this residue was shown to be energetically coupled to Tyr127 on the other side  
14 of the interface. Interestingly, equivalent residues in GLIC (Cys27; Glu26 and  
15 Tyr111) are part of a water network at the bottom of the ECD (Figure 5A). Another  
16 notable example is the mutation P250T in GlyR  $\alpha$ 1 that causes hyperekplexia (Saul  
17 et al., 1999) and which is homologous to Glu222 in GLIC. Our work on GLIC gives  
18 general mechanisms of how mutations affect pLGICs transitions, and further work,  
19 for example by voltage-clamp fluorometry, would be required to challenge such  
20 mechanisms in the context of congenital pathologies on neurotransmitter receptors.

## 21 **Material and methods**

### 22 **Mutagenesis**

23 All GLIC mutants were obtained using site directed mutagenesis on the C27S  
24 background of GLIC, except for the Bim136-Y28F-C27 where the endogenous  
25 cysteine was introduced back. Similarly, to previous studies, two different vectors  
26 were used: a pet20b vector with GLIC fused to MBP by a linker containing a  
27 thrombin cleavage site under a T7 promoter for expression in *E. coli* BL21; a pmt3  
28 vector for expression in oocytes with GLIC containing a Cter HA tag and in Nter the  
29 peptide signal from alpha7-nAChR. Incorporation of the mutations in both vectors  
30 were verified by sequencing.

## 1 **GLIC mutant production and purification**

2 Protein production of MBP-GLIC and labeling was done as previously  
3 described (Menny et al., 2017) with a few modifications. In brief, MBP-GLIC was  
4 expressed in BL21 *E coli* cells overnight at 20°C after induction by 100 µM IPTG.  
5 Cells were collected and resuspended in buffer A containing 20 mM Tris; 300 mM  
6 NaCl at pH 7.4 and subsequently disrupted by sonication. After membrane  
7 separation by ultracentrifugation, membrane proteins were extracted overnight in  
8 buffer A supplemented with 2 % DDM. After ultracentrifugation, supernatant was  
9 incubated with amylose resin and MBP-GLIC was eluted using buffer A  
10 supplemented with DDM 0.02 % and saturating concentration of maltose. To  
11 remove endogenous maltoporin contaminant, a first size exclusion chromatography  
12 was performed on superose 6 10/300 GL in buffer A with 0.02 % DDM. GLIC-MBP  
13 concentration was measured and the protein was incubated overnight at 4°C with  
14 thrombin to cleave off MBP and with monobromobimane (mBBr) at a 1:5 (GLIC  
15 monomer:fluorophore) ratio, to label the protein. The mBBr dye being solubilized in  
16 DMSO, the sample volume was adjusted to remain below 1% DMSO final  
17 concentration. After labeling, a second gel filtration was done to get rid of the MBP  
18 and unbound dye molecules. GLIC-Bimane samples were flash frozen in liquid  
19 nitrogen and stored at -80°C prior to fluorescence measurements.

## 20 **Steady-state fluorescence measurements**

21 Fluorescence measurements were done as previously described (Menny et  
22 al., 2017). Samples were equilibrated to room temperature and diluted with buffer A  
23 with 0.02 % DDM to reach a concentration around 40 µg.mL<sup>-1</sup>. Fluorescence  
24 recording buffers consisting of 300 mM NaCl, 2.7 mM KCl, 5.3 mM Na<sub>2</sub>HPO<sub>4</sub> and  
25 1.5 mM KH<sub>2</sub>PO<sub>4</sub> were prepared beforehand and their pH was adjusted either to 7.4  
26 or to different pH in order to reach the desired pH value (from pH 8 to 3) after mixing  
27 equal volumes with Buffer A 0.02 % DDM. Measurements were done at 20°C in 1  
28 mL disposable UV transparent 2.5 mL cuvettes in a Jasco 8200 fluorimeter with 385  
29 nm excitation wavelength and the emission spectra was recorded through 2.5 nm  
30 slits from 420 to 530 nm. Other parameters were kept constant throughout the study.  
31 On the sample at pH 7.4, an addition of SDS to reach 1 % final concentration was

1 done to obtain the  $F_{SDS}$  value and a tryptophan emission spectrum was done before  
2 and after SDS addition in order to monitor denaturation.

3 Fitting of fluorescence measurements was done on each fluorescence series  
4 (values from one pH range) with at least 3 series per mutant using the following Hill  
5 equation:

$$6 \quad y(x) = \frac{F_{max} + x^{n_H}}{x^{n_H} + EC_{50}^{n_H}} + F_0$$

7 where  $F_{max}$  represents the maximal change in fluorescence amplitude;  $F_0$  the initial  
8 fluorescence at pH 7.8;  $n_H$  represents the hill number and  $EC_{50}$  the proton  
9 concentration for which half of the maximal fluorescence change is measured. For  
10 Bim136-Q101W and Bim250-Y197 and in some other mutants, we excluded the  
11 data point below pH 3.5 that show a small but significant change in fluorescence  
12 intensity in the opposite direction to the quenching curves. We did not fit the Bim135-  
13 W72 mutant that shows a bell shape curve.

#### 14 **Electrophysiological recordings**

15 Electrophysiological recordings of GLIC were made on *Xenopus* oocytes  
16 provided either by the Centre de Ressources Biologiques Xénopes (Rennes-  
17 France) or by Ecocyte Bioscience (Dortmund-Germany). Recordings were made as  
18 previously described (Nury et al., 2011) with oocytes 48-96 h post nucleus injection  
19 with a mix containing  $80 \text{ ng} \cdot \mu\text{L}^{-1}$  of GLIC cDNA and  $25 \text{ ng} \cdot \mu\text{L}^{-1}$  of GFP cDNA.  
20 Recording were done in MES buffer containing 100 mM NaCl, 3 mM KCl, 1 mM  
21  $\text{CaCl}_2$ , 1 mM  $\text{MgCl}_2$  and 10 mM MES with pH adjusted by addition of 2 M HCl. The  
22 perfusion chamber contained two compartments and only a portion of the oocyte  
23 was perfused with low pH solution. Bunte salt bimeane labeling was performed prior  
24 to recording by incubation for 1h at room temperature with the dye concentrated at  
25 1 mM in MES buffer. To correct data for rundown, a solution with a pH value in the  
26 middle of the dose response (usually pH 5) was used as a reference at the beginning  
27 and the end of the dose response and every 3/4 applications. To limit the effect of  
28 propofol that can stay in the membrane in-between applications (Heusser et al.,  
29 2018), only a limited number of pH solution were tested per dose-response.

30 Electrophysiological recordings were analyzed using AxoGraph X and Prism  
31 was used to fit individual dose responses using the Hill equation:



1 
$$y(x) = \frac{I_{max} + x^{n_H}}{x^{n_H} + EC_{50}^{n_H}}$$

2 where  $I_{max}$  represents the maximal current in percentage of the response from the  
3 reference solution.  $n_H$  represents the hill number and  $EC_{50}$  the proton concentration  
4 for which half of the maximal electrophysiological response is recorded.

## 5 **Xenopus oocytes immunolabeling**

6 Mutants generating currents smaller than 500 nA at high proton  
7 concentrations were categorized as non-functional. For these non-functional  
8 mutants, expression tests were performed by immunolabeling of oocytes as  
9 previously described (Prevost et al., 2012; Sauguet et al., 2014). 3 to 4 days post  
10 injection, GFP positive oocytes were fixed overnight in paraformaldehyde (PFA) 4  
11 % at 4°C. Immunolabeling was performed after 30 min saturation by 10 % horse  
12 serum in PBS buffer. Rabbit anti HA-tag primary antibody was incubated for 90 min  
13 in 2 % horse serum and the secondary antibody anti-Rabbit coupled to Alexa Fluor  
14 645 was incubated for 30 min. After a second PFA fixation overnight, oocytes were  
15 included in warm 3 % low-melting agarose and 40  $\mu$ m slices were made using a  
16 vibratome on a portion of the oocyte. Several slices per oocytes were mounted one  
17 a slide and analyzed in an epi-fluorescence microscope using constant exposure  
18 time between none functional mutant and functional mutants used as positive  
19 controls.

## 20 **Molecular Modeling**

21 Each structure (4NPQ and 4HFI) was fitted, using iMODfit (López-Blanco and  
22 Chacón, 2013), to the simulated electron-microscopy envelope of the other  
23 structure. The EM density map resolution was set to 5 Å and the grid size to 0.5 Å.  
24 iMODfit was then used to fit each structure to the density of the other structure with  
25 half of the modes considered for the conformational change, yielding trajectory A  
26 (4NPQ to 4HFI) and trajectory B (4HFI to 4NPQ). The structure of the protein and  
27 ligand were converted to pdbqt files with the software open babel 2.4.1. Covalent  
28 docking was then performed with the software smina (Koes et al., 2013). The box  
29 for docking has been defined around the mutated residue, with a size of 30 Å in  
30 each direction. Covalent docking forced the biman to be in direct contact with the  
31 SG atom of the cysteine which was introduced experimentally.

## 1   **References**

- 2   Althoff T, Hibbs RE, Banerjee S and Gouaux E. 2014. 'X-ray structures of GluCl in  
3       apo states reveal a gating mechanism of Cys-loop receptors'. *Nature*, 512(7514),  
4       pp. 333–337. doi: 10.1038/nature13669.
- 5   Bertozzi C, Zimmermann I, Engeler S, Hilf RJC and Dutzler R. 2016. 'Signal  
6       Transduction at the Domain Interface of Prokaryotic Pentameric Ligand-Gated  
7       Ion Channels'. *PLoS Biology*. Edited by P.-J. Corringer, 14(3), p. e1002393. doi:  
8       10.1371/journal.pbio.1002393.
- 9   Bocquet N, Prado de Carvalho L, Cartaud J, Neyton J, Le Poupon C, Taly A, Grutter  
10    T, Changeux J-P and Corringer P-J. 2007. 'A prokaryotic proton-gated ion  
11    channel from the nicotinic acetylcholine receptor family'. *Nature*, 445(7123), pp.  
12    116–119. doi: 10.1038/nature05371.
- 13   Bocquet N, Nury H, Baaden M, Le Poupon C, Changeux J-P, Delarue M and  
14    Corringer P-J. 2009. 'X-ray structure of a pentameric ligand-gated ion channel in  
15    an apparently open conformation.' *Nature*. Nature Publishing Group, 457(7225),  
16    pp. 111–114. doi: 10.1038/nature07462.
- 17   Bode A and Lynch JW. 2014. 'The impact of human hyperekplexia mutations on  
18    glycine receptor structure and function'. *Molecular Brain*, 7(1), p. 2. doi:  
19    10.1186/1756-6606-7-2.
- 20   Calimet N, Simoes M, Changeux J-P, Karplus M, Taly A and Cecchini M. 2013.  
21    'PNAS Plus: From the Cover: A gating mechanism of pentameric ligand-gated  
22    ion channels'. *Proceedings of the National Academy of Sciences*, 110(42), pp.  
23    E3987–E3996. doi: 10.1073/pnas.1313785110.
- 24   Carswell CL, Sun J and Baenziger JE. 2015. 'Intramembrane Aromatic Interactions  
25    Influence the Lipid Sensitivities of Pentameric Ligand-gated Ion Channels'.  
26    *Journal of Biological Chemistry*, 290(4), pp. 2496–2507. doi:  
27    10.1074/jbc.M114.624395.
- 28   Cheng MH, Coalson RD and Tang P. 2010. 'Molecular Dynamics and Brownian  
29    Dynamics Investigation of Ion Permeation and Anesthetic Halothane Effects on  
30    a Proton-Gated Ion Channel'. *Journal of the American Chemical Society*,  
31    132(46), pp. 16442–16449. doi: 10.1021/ja105001a.
- 32   Du J, Lü W, Wu S, Cheng Y and Gouaux E. 2015. 'Glycine receptor mechanism  
33    elucidated by electron cryo-microscopy'. *Nature*, 526(7572), pp. 224–229. doi:  
34    10.1038/nature14853.
- 35   Duret G, Van Renterghem C, Weng Y, Prevost M, Moraga-Cid G, Huon C, Sonner  
36    JM and Corringer P-J. 2011. 'Functional prokaryotic-eukaryotic chimera from the  
37    pentameric ligand-gated ion channel family'. *Proceedings of the National  
38    Academy of Sciences*, 108(29), pp. 12143–12148. doi:  
39    10.1073/pnas.1104494108.
- 40   Elenes S and Auerbach A. 2002. 'Desensitization of diliganded mouse muscle

- 1       nicotinic acetylcholine receptor channels'. *The Journal of Physiology*, 541(2), pp.  
2       367–383. doi: 10.1113/jphysiol.2001.016022.
- 3       Esmenjaud J, Stroebel D, Chan K, Grand T, David M, Wollmuth LP, Taly A and  
4       Paoletti P. 2019. 'An inter-dimer allosteric switch controls NMDA receptor  
5       activity'. *The EMBO Journal*, 38(2), pp. 1–16. doi: 10.15252/embj.201899894.
- 6       Fourati Z, Howard RJ, Heusser SA, Hu H, Ruza RR, Sauguet L, Lindahl E and  
7       Delarue M. 2018. 'Structural Basis for a Bimodal Allosteric Mechanism of General  
8       Anesthetic Modulation in Pentameric Ligand-Gated Ion Channels'. *Cell Reports*.  
9       ElsevierCompany., 23(4), pp. 993–1004. doi: 10.1016/j.celrep.2018.03.108.
- 10      Fritsch S, Ivanov I, Wang H and Cheng X. 2011. 'Ion Selectivity Mechanism in a  
11      Bacterial Pentameric Ligand-Gated Ion Channel'. *Biophysical Journal*.  
12      Biophysical Society, 100(2), pp. 390–398. doi: 10.1016/j.bpj.2010.11.077.
- 13      Galzi JL, Edelstein SJ and Changeux J-P. 1996. 'The multiple phenotypes of  
14      allosteric receptor mutants.' *Proceedings of the National Academy of Sciences*,  
15      93(5), pp. 1853–1858. doi: 10.1073/pnas.93.5.1853.
- 16      Gharpure A, Teng J, Zhuang Y, Noviello CM, Walsh RM, Cabuco R, Howard RJ,  
17      Zaveri NT, Lindahl E and Hibbs RE. 2019. 'Agonist Selectivity and Ion Permeation  
18      in the  $\alpha 3\beta 4$  Ganglionic Nicotinic Receptor'. *Neuron*, 104(3), pp. 501-511.e6. doi:  
19      10.1016/j.neuron.2019.07.030.
- 20      Gonzalez-Gutierrez G, Wang Y, Cymes GD, Tajkhorshid E and Grosman C. 2017.  
21      'Chasing the open-state structure of pentameric ligand-gated ion channels'.  
22      *Journal of General Physiology*, 149(12), pp. 1119–1138. doi:  
23      10.1085/jgp.201711803.
- 24      Gupta S, Chakraborty S, Vij R and Auerbach A. 2017. 'A mechanism for  
25      acetylcholine receptor gating based on structure, coupling, phi, and flip'. *Journal*  
26      *of General Physiology*, 149(1), pp. 85–103. doi: 10.1085/jgp.201611673.
- 27      Heidmann T and Changeux J-P. 1980. 'Interaction of a fluorescent agonist with the  
28      membrane-bound acetylcholine receptor from *Torpedomarmorata* in the  
29      millisecond time range: Resolution of an "intermediate" conformational transition  
30      and evidence for positive cooperative effects'. *Biochemical and Biophysical*  
31      *Research Communications*, 97(3), pp. 889–896. doi: 10.1016/0006-  
32      291X(80)91460-6.
- 33      Hernandez CC and Macdonald RL. 2019. 'A structural look at GABAA receptor  
34      mutations linked to epilepsy syndromes'. *Brain Research*. Elsevier B.V.,  
35      1714(July 2018), pp. 234–247. doi: 10.1016/j.brainres.2019.03.004.
- 36      Heusser SA, Lycksell M, Wang X, McComas SE, Howard RJ and Lindahl E. 2018.  
37      'Allosteric potentiation of a ligand-gated ion channel is mediated by access to a  
38      deep membrane-facing cavity'. *Proceedings of the National Academy of*  
39      *Sciences*, 115(42), pp. 10672–10677. doi: 10.1073/pnas.1809650115.
- 40      Hilf RJC and Dutzler R. 2008. 'X-ray structure of a prokaryotic pentameric ligand-  
41      gated ion channel'. *Nature*, 452(7185), pp. 375–379. doi: 10.1038/nature06717.

- 1 Hu H, Nemezc Á, Van Renterghem C, Fourati Z, Sauguet L, Corringer P-J and  
2 Delarue M. 2018. 'Crystal structures of a pentameric ion channel gated by  
3 alkaline pH show a widely open pore and identify a cavity for modulation'.  
4 *Proceedings of the National Academy of Sciences*, 115(17), pp. E3959–E3968.  
5 doi: 10.1073/pnas.1717700115.
- 6 Hu H, Ataka K, Menny A, Fourati Z, Sauguet L, Corringer P, Koehl P, Heberle J and  
7 Delarue M. 2018. 'Electrostatics, proton sensor, and networks governing the  
8 gating transition in GLIC, a proton-gated pentameric ion channel'. *Proceedings*  
9 *of the National Academy of Sciences*, 115(52), pp. E12172–E12181. doi:  
10 10.1073/pnas.1813378116.
- 11 Hu H, Howard RJ, Bastolla U, Lindahl E and Delarue M. 2020. 'Structural basis for  
12 allosteric transitions of a multidomain pentameric ligand-gated ion channel'.  
13 *Proceedings of the National Academy of Sciences*, 117(24), pp. 13437–13446.  
14 doi: 10.1073/pnas.1922701117.
- 15 Jaiteh M, Taly A and Hénin J. 2016. 'Evolution of Pentameric Ligand-Gated Ion  
16 Channels: Pro-Loop Receptors'. *PLOS ONE*. Edited by S. Bertrand, 11(3), p.  
17 e0151934. doi: 10.1371/journal.pone.0151934.
- 18 Johannesen K *et al.* 2016. 'Phenotypic spectrum of GABRA1'. *Neurology*, 87(11),  
19 pp. 1140–1151. doi: 10.1212/WNL.0000000000003087.
- 20 Jones Brunette AM and Farrens DL. 2014. 'Distance Mapping in Proteins Using  
21 Fluorescence Spectroscopy: Tyrosine, like Tryptophan, Quenches Bimane  
22 Fluorescence in a Distance-Dependent Manner'. *Biochemistry*, 53(40), pp. 6290–  
23 6301. doi: 10.1021/bi500493r.
- 24 Koes DR, Baumgartner MP and Camacho CJ. 2013. 'Lessons Learned in Empirical  
25 Scoring with smina from the CSAR 2011 Benchmarking Exercise'. *Journal of*  
26 *Chemical Information and Modeling*, 53(8), pp. 1893–1904. doi:  
27 10.1021/ci300604z.
- 28 Laha KT, Ghosh B and Czajkowski C. 2013. 'Macroscopic Kinetics of Pentameric  
29 Ligand Gated Ion Channels: Comparisons between Two Prokaryotic Channels  
30 and One Eukaryotic Channel'. *PLoS ONE*. Edited by J. D. Spafford, 8(11), p.  
31 e80322. doi: 10.1371/journal.pone.0080322.
- 32 Lape R, Colquhoun D and Sivilotti LG. 2008. 'On the nature of partial agonism in  
33 the nicotinic receptor superfamily'. *Nature*, 454(7205), pp. 722–727. doi:  
34 10.1038/nature07139.
- 35 Lavery D, Thomas P, Field M, Andersen OJ, Gold MG, Biggin PC, Gielen M and  
36 Smart TG. 2017. 'Crystal structures of a GABAA-receptor chimera reveal new  
37 endogenous neurosteroid-binding sites'. *Nature Structural & Molecular Biology*.  
38 Nature Publishing Group, 24(11), pp. 977–985. doi: 10.1038/nsmb.3477.
- 39 Lev B, Murail S, Poitevin F, Cromer BA, Baaden M, Delarue M and Allen TW. 2017.  
40 'String method solution of the gating pathways for a pentameric ligand-gated ion  
41 channel'. *Proceedings of the National Academy of Sciences*, 114(21), pp.  
42 E4158–E4167. doi: 10.1073/pnas.1617567114.

- 1 López-Blanco JR and Chacón P. 2013. 'iMODFIT: Efficient and robust flexible fitting  
2 based on vibrational analysis in internal coordinates'. *Journal of Structural*  
3 *Biology*. Elsevier Inc., 184(2), pp. 261–270. doi: 10.1016/j.jsb.2013.08.010.
- 4 Mansoor SE, DeWitt M a. and Farrens DL. 2010. 'Distance Mapping in Proteins  
5 Using Fluorescence Spectroscopy: The Tryptophan-Induced Quenching (TrIQ)  
6 Method'. *Biochemistry*, 49(45), pp. 9722–9731. doi: 10.1021/bi100907m.
- 7 Mansoor SE, Mchaourab HS and Farrens DL. 2002. 'Mapping Proximity within  
8 Proteins Using Fluorescence Spectroscopy. A Study of T4 Lysozyme Showing  
9 That Tryptophan Residues Quench Bimane Fluorescence †'. *Biochemistry*,  
10 41(8), pp. 2475–2484. doi: 10.1021/bi011198i.
- 11 Masiulis S, Desai R, Uchański T, Serna Martin I, Laverty D, Karia D, Malinauskas  
12 T, Zivanov J, Pardon E, Kotecha A, Steyaert J, Miller KW and Aricescu AR. 2019.  
13 'GABAA receptor signalling mechanisms revealed by structural pharmacology'.  
14 *Nature*, 565(7740), pp. 454–459. doi: 10.1038/s41586-018-0832-5.
- 15 Menny A, Lefebvre SN, Schmidpeter PAM, Drège E, Fourati Z, Delarue M, Edelstein  
16 SJ, Nimigean CM, Joseph D and Corringer P-J. 2017. 'Identification of a pre-  
17 active conformation of a pentameric channel receptor'. *eLife*, 6, pp. 1–28. doi:  
18 10.7554/eLife.23955.
- 19 Moraga-Cid G, Sauguet L, Huon C, Malherbe L, Girard-Blanc C, Petres S, Murail S,  
20 Taly A, Baaden M, Delarue M and Corringer P-J. 2015. 'Allosteric and  
21 hyperekplexic mutant phenotypes investigated on an  $\alpha$  1 glycine receptor  
22 transmembrane structure'. *Proceedings of the National Academy of Sciences*,  
23 112(9), pp. 2865–2870. doi: 10.1073/pnas.1417864112.
- 24 Mowrey D, Chen Q, Liang Y, Liang J, Xu Y and Tang P. 2013. 'Signal Transduction  
25 Pathways in the Pentameric Ligand-Gated Ion Channels'. *PLoS ONE*. Edited by  
26 M. N. Nitabach, 8(5), p. e64326. doi: 10.1371/journal.pone.0064326.
- 27 Mukhtasimova N, Lee WY, Wang H-L and Sine SM. 2009. 'Detection and trapping  
28 of intermediate states priming nicotinic receptor channel opening'. *Nature*. Nature  
29 Publishing Group, 459(7245), pp. 451–454. doi: 10.1038/nature07923.
- 30 Nemecz Á, Prevost MS, Menny A and Corringer P-J. 2016. 'Emerging Molecular  
31 Mechanisms of Signal Transduction in Pentameric Ligand-Gated Ion Channels'.  
32 *Neuron*, 90(3), pp. 452–470. doi: 10.1016/j.neuron.2016.03.032.
- 33 Nemecz Á, Hu H, Fourati Z, Van Renterghem C, Delarue M and Corringer P-J. 2017.  
34 'Full mutational mapping of titratable residues helps to identify proton-sensors  
35 involved in the control of channel gating in the *Gloeobacter violaceus* pentameric  
36 ligand-gated ion channel'. *PLOS Biology*. Edited by R. Dutzler, 15(12), p.  
37 e2004470. doi: 10.1371/journal.pbio.2004470.
- 38 Nury H, Van Renterghem C, Weng Y, Tran A, Baaden M, Dufresne V, Changeux J-  
39 P, Sonner JM, Delarue M and Corringer P-J. 2011. 'X-ray structures of general  
40 anaesthetics bound to a pentameric ligand-gated ion channel'. *Nature*. Nature  
41 Publishing Group, a division of Macmillan Publishers Limited. All Rights  
42 Reserved., 469(7330), pp. 428–431. doi: 10.1038/nature09647.

- 1 Orellana L, Yoluk O, Carrillo O, Orozco M and Lindahl E. 2016. 'Prediction and  
2 validation of protein intermediate states from structurally rich ensembles and  
3 coarse-grained simulations'. *Nature Communications*. Nature Publishing Group,  
4 7(1), p. 12575. doi: 10.1038/ncomms12575.
- 5 Parikh RB, Bali M and Akabas MH. 2011. 'Structure of the M2 Transmembrane  
6 Segment of GLIC, a Prokaryotic Cys Loop Receptor Homologue from  
7 *Gloeobacter violaceus*, Probed by Substituted Cysteine Accessibility'. *Journal of*  
8 *Biological Chemistry*, 286(16), pp. 14098–14109. doi: 10.1074/jbc.M111.221895.
- 9 Polovinkin L, Hassaine G, Perot J, Neumann E, Jensen AA, Lefebvre SN, Corringer  
10 P-J, Neyton J, Chipot C, Dehez F, Schoehn G and Nury H. 2018. 'Conformational  
11 transitions of the serotonin 5-HT<sub>3</sub> receptor'. *Nature*, 563(7730), pp. 275–279. doi:  
12 10.1038/s41586-018-0672-3.
- 13 Prevost MS, Sauguet L, Nury H, Van Renterghem C, Huon C, Poitevin F, Baaden  
14 M, Delarue M and Corringer P-J. 2012. 'A locally closed conformation of a  
15 bacterial pentameric proton-gated ion channel'. *Nature Structural & Molecular*  
16 *Biology*. Nature Publishing Group, a division of Macmillan Publishers Limited. All  
17 Rights Reserved., 19(6), pp. 642–649. doi: 10.1038/nsmb.2307.
- 18 Rienzo M, Rocchi AR, Threatt SD, Dougherty DA and Lummis SCR. 2016.  
19 'Perturbation of Critical Prolines in *Gloeobacter violaceus* Ligand-gated Ion  
20 Channel (GLIC) Supports Conserved Gating Motions among Cys-loop  
21 Receptors'. *Journal of Biological Chemistry*, 291(12), pp. 6272–6280. doi:  
22 10.1074/jbc.M115.694372.
- 23 Rienzo M, Lummis SCR and Dougherty DA. 2014. 'Structural Requirements in the  
24 Transmembrane Domain of GLIC Revealed by Incorporation of Noncanonical  
25 Histidine Analogs'. *Chemistry & Biology*, 21(12), pp. 1700–1706. doi:  
26 10.1016/j.chembiol.2014.10.019.
- 27 Sakmann B, Patlak J and Neher E. 1980. 'Single acetylcholine-activated channels  
28 show burst-kinetics in presence of desensitizing concentrations of agonist'.  
29 *Nature*, 286(5768), pp. 71–73. doi: 10.1038/286071a0.
- 30 Sauguet L, Poitevin F, Murail S, Van Renterghem C, Moraga-Cid G, Malherbe L,  
31 Thompson AW, Koehl P, Corringer P-J, Baaden M and Delarue M. 2013.  
32 'Structural basis for ion permeation mechanism in pentameric ligand-gated ion  
33 channels'. *The EMBO Journal*. EMBO Press, 32(5), pp. 728–741. doi:  
34 10.1038/emboj.2013.17.
- 35 Sauguet L, Shahsavar A, Poitevin F, Huon C, Menny A, Nemezc A, Haouz A,  
36 Changeux J-P, Corringer P-J and Delarue M. 2014. 'Crystal structures of a  
37 pentameric ligand-gated ion channel provide a mechanism for activation'.  
38 *Proceedings of the National Academy of Sciences*, 111(3), pp. 966–971. doi:  
39 10.1073/pnas.1314997111.
- 40 Sauguet L, Shahsavar A and Delarue M. 2015. 'Crystallographic studies of  
41 pharmacological sites in pentameric ligand-gated ion channels'. *Biochimica et*  
42 *Biophysica Acta (BBA) - General Subjects*. Elsevier B.V., 1850(3), pp. 511–523.

- 1       doi: 10.1016/j.bbagen.2014.05.007.
- 2       Saul B, Kuner T, Sobetzko D, Brune W, Hanefeld F, Meinck H-M and Becker C-M.  
3       1999. 'Novel GLRA1 Missense Mutation (P250T) in Dominant Hyperekplexia  
4       Defines an Intracellular Determinant of Glycine Receptor Channel Gating'. *The*  
5       *Journal of Neuroscience*, 19(3), pp. 869–877. doi: 10.1523/JNEUROSCI.19-03-  
6       00869.1999.
- 7       Shen X, Fukuda T, Ohno K, Sine SM and Engel AG. 2008. 'Congenital myasthenia-  
8       related AChR  $\delta$  subunit mutation interferes with intersubunit communication  
9       essential for channel gating'. *Journal of Clinical Investigation*, 118(5), pp. 1867–  
10      1876. doi: 10.1172/JCI34527.
- 11      Taly A, Delarue M, Grutter T, Nilges M, Le Novère N, Corringer P-J and Changeux  
12      J-P. 2005. 'Normal Mode Analysis Suggests a Quaternary Twist Model for the  
13      Nicotinic Receptor Gating Mechanism'. *Biophysical Journal*, 88(6), pp. 3954–  
14      3965. doi: 10.1529/biophysj.104.050229.
- 15      Taly A and Changeux J-P. 2008. 'Functional Organization and Conformational  
16      Dynamics of the Nicotinic Receptor'. *Annals of the New York Academy of*  
17      *Sciences*, 1132(1), pp. 42–52. doi: 10.1196/annals.1405.008.
- 18      Zimmermann I and Dutzler R. 2011. 'Ligand Activation of the Prokaryotic  
19      Pentameric Ligand-Gated Ion Channel ELIC'. *PLoS Biology*. Edited by D. E.  
20      Clapham, 9(6), p. e1001101. doi: 10.1371/journal.pbio.1001101.

## 21      **Acknowledgments**

22             The work was supported by the 'Agence Nationale de la Recherche' (grant  
23      ANR-13-BSV8-0020, Pentagate), the doctoral school ED3C and the 'Foundation  
24      pour la Recherche Médicale' (PhD funding to SNL), the "Initiative d'Excellence"  
25      (cluster of excellence LABEX Dynamo, ANR-11-LABX-0011 to AT) and the ERC  
26      (grant No. 788974, Dynacotine). The authors would like to thank Marc Gielen, Akos  
27      Nemecz and Marie Prévost for critical reading of the manuscript.

## 28      **Author contribution**

29             SNL and PJC designed fluorescent quenching experiments; SNL, AM and  
30      KM performed experiments; AT designed and performed in silico simulations. All  
31      authors analyzed the data. SNL and PJC wrote the manuscript with the help of the  
32      other authors.

## 1 Supplementary figures

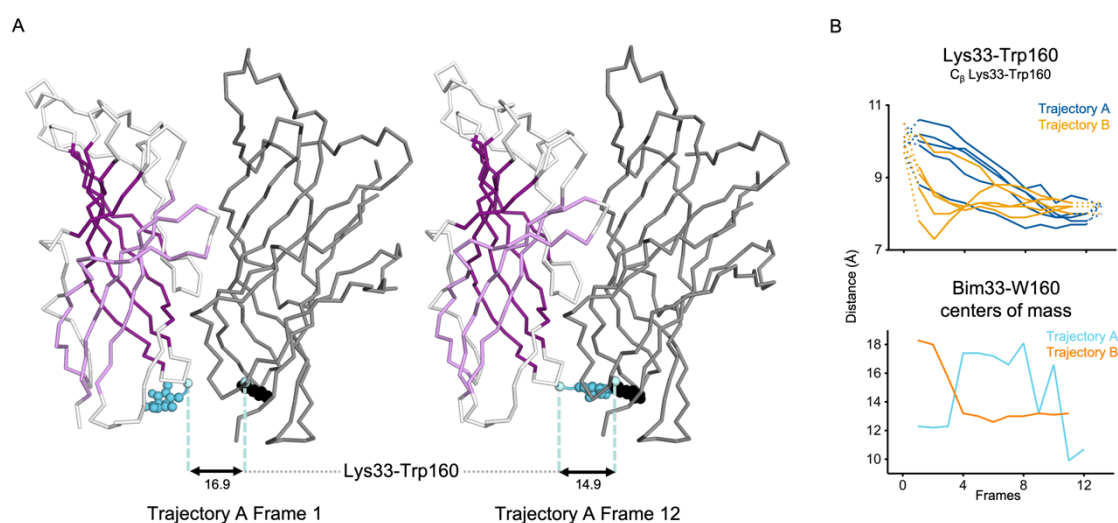

2

3 **Figure 3-Supplementary 1. Evolution of ECD inter-subunits distances at the bottom of**  
4 **the ECD in iMODfit trajectories.** (A) Snapshots of two subunits of GLIC ECD in the first and  
5 last frame of the trajectory A with Bim33-W160 quenching pair modeled. One subunit is shown  
6 in grey, the other in white with  $\beta$ -sheets forming the  $\beta$ -sandwich shown in dark and light purple;  
7 bimane is shown in blue and quencher in black spheres;  $C_{\beta}$  atoms used for measurements are  
8 shown in pale blue spheres and distances are indicated in angstroms. (B) Inter-subunit  
9 distances showing ECD compaction at the Lys33-Trp160 level (top panel) and between bimane  
10 and W160 centers of mass (bottom panel) in both trajectories A and B. Points at frames 0 and  
11 13 are the distances in pH4 and pH7 structures subunits interfaces.



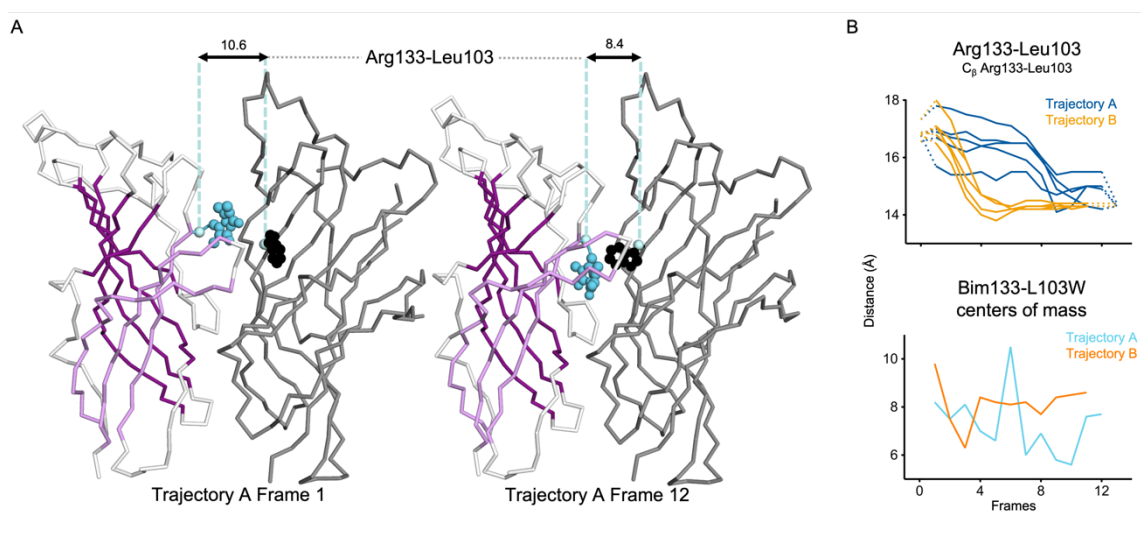

1

2

3

4

5

6

7

8

9

10

**Figure 3-Supplementary 2. Evolution of ECD inter-subunits distances at the top of the ECD in iMODfit trajectories.** (A) Snapshots of two subunits of GLIC ECD in the first and last frame of the trajectory A with a Bim133-L103W quenching pair modeled. One subunit is shown in grey, the other in white with  $\beta$ -sheets forming the  $\beta$ -sandwich shown in dark and light purple; bimeane is shown in blue and quencher in black spheres; C $_{\beta}$  atoms used for measurements are shown in pale blue spheres and distances are indicated in angstroms. (B) Inter-subunit distances showing ECD compaction at the Arg133-Leu103 level (top panel) and between bimeane and L103W centers of mass (bottom panel) in both trajectories A and B. Points at frames 0 and 13 are the distances in pH4 and pH7 structures subunits interfaces.

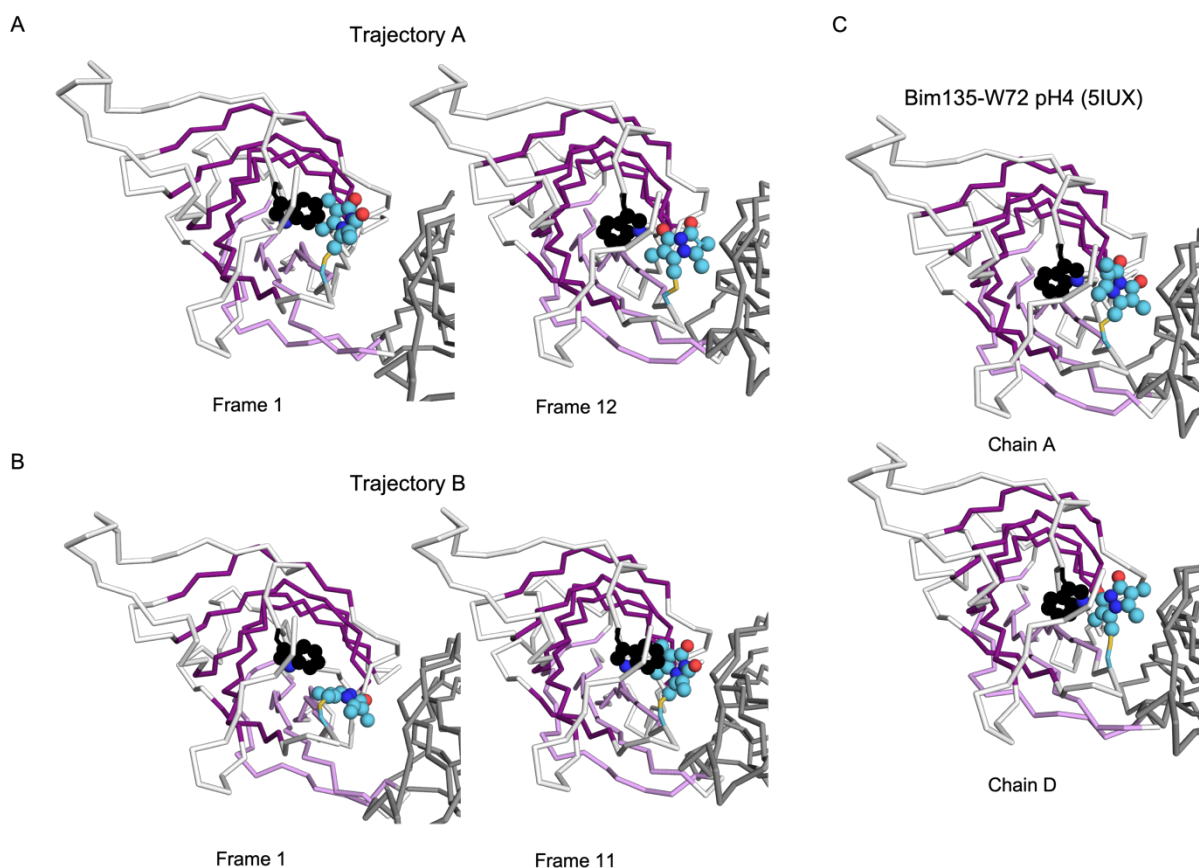

1

2 **Figure 3-Supplementary 3. Evolution of Bim135-W72 orientation at the ECD intra-**  
 3 **subunits in iMODfit trajectories.** (A) Snapshots of one subunit of GLIC ECD, top view in the  
 4 first and last frame of the trajectory A with Bim135-W72 quenching pair modeled. The adjacent  
 5 subunit is shown in grey, and the main subunit is shown in white with  $\beta$ -sheets forming the  $\beta$ -  
 6 sandwich shown in dark and light purple; bimane is shown in blue and quencher in black  
 7 spheres. (B) Snapshots for the trajectory B. (C) Snapshots from the structure resolved by X-ray  
 8 of Bim135-W72 at pH 4 (5IUx). Bimane was resolved in two out of five chains and show a similar  
 9 orientation to the one found in the last frames of both trajectories (A and B right panels).

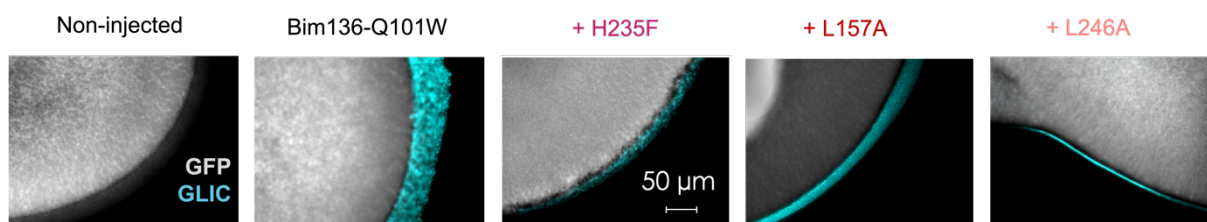

10

11 **Figure 7-Supplementary 1. Immunofluorescence microscopy data showing GLIC**  
 12 **expression at the oocytes surface.** In grey is the GFP fluorescence and in blue the  
 13 fluorescence resulting from GLIC immunolabeling via anti-HA antibody.
